# Supplementary material for: Origin and evolution of metal P-type ATPases in Plantae (Archaeplastida)
Source: Front Plant Sci. 2014 Jan 7;4:544. doi: 10.3389/fpls.2013.00544 (PMC3922081; doi:10.3389/fpls.2013.00544)
Supplement: Table S1 — Overview of prokaryotic genomes included in the study. The number of P-type ATPases identified in each genome is provided for each architecture subtype (AI–AIII) and, for architecture AI, for each of monovalent metal (AI.Me+) and divalent metal (AI.Me2+) groups. [file TableS1.XLS]

## Sheet: table-s1
								p-Type ATPase architectures
ncbi.taxid	organism	domain	phylum	ncbi.path	accessions	AI	AI.Me+	AI.Me2+	AII	AIII
666510	Acidilobus saccharovorans 345-15	Archaea	Crenarchaeota	Acidilobus_saccharovorans_345_15_uid51395	NC_014374	1	1	0	0	0
272557	Aeropyrum pernix K1	Archaea	Crenarchaeota	Aeropyrum_pernix_K1_uid57757	NC_000854	2	1	1	0	0
397948	Caldivirga maquilingensis IC-167	Archaea	Crenarchaeota	Caldivirga_maquilingensis_IC_167_uid58711	NC_009954	1	1	0	0	0
765177	Desulfurococcus mucosus DSM 2162	Archaea	Crenarchaeota	Desulfurococcus_mucosus_DSM_2162_uid62227	NC_014961	1	1	0	1	0
1163730	Fervidicoccus fontis Kam940	Archaea	Crenarchaeota	Fervidicoccus_fontis_Kam940_uid162201	NC_017461	0	0	0	1	1
415426	Hyperthermus butylicus DSM 5456	Archaea	Crenarchaeota	Hyperthermus_butylicus_DSM_5456_uid57755	NC_008818	1	0	1	0	0
453591	Ignicoccus hospitalis KIN4/I	Archaea	Crenarchaeota	Ignicoccus_hospitalis_KIN4_I_uid58365	NC_009776	0	0	0	0	0
583356	Ignisphaera aggregans DSM 17230	Archaea	Crenarchaeota	Ignisphaera_aggregans_DSM_17230_uid51875	NC_014471	1	1	0	0	0
399549	Metallosphaera sedula DSM 5348	Archaea	Crenarchaeota	Metallosphaera_sedula_DSM_5348_uid58717	NC_009440	1	1	0	1	0
410359	Pyrobaculum calidifontis JCM 11548	Archaea	Crenarchaeota	Pyrobaculum_calidifontis_JCM_11548_uid58787	NC_009073	1	1	0	0	0
368408	Thermofilum pendens Hrk 5	Archaea	Crenarchaeota	Thermofilum_pendens_Hrk_5_uid58563	NC_008696,NC_008698	0	0	0	2	1
439481	Aciduliprofundum boonei T469	Archaea	Euryarchaeota	Aciduliprofundum_boonei_T469_uid43333	NC_013926	0	0	0	1	0
224325	Archaeoglobus fulgidus DSM 4304	Archaea	Euryarchaeota	Archaeoglobus_fulgidus_DSM_4304_uid57717	NC_000917	2	2	0	0	0
519442	Halorhabdus utahensis DSM 12940	Archaea	Euryarchaeota	Halorhabdus_utahensis_DSM_12940_uid59189	NC_013158	2	1	1	1	0
1041930	Methanocella conradii HZ254	Archaea	Euryarchaeota	Methanocella_conradii_HZ254_uid157911	NC_017034	4	2	2	4	1
419665	Methanococcus aeolicus Nankai-3	Archaea	Euryarchaeota	Methanococcus_aeolicus_Nankai_3_uid58823	NC_009635	2	1	1	2	0
410358	Methanocorpusculum labreanum Z	Archaea	Euryarchaeota	Methanocorpusculum_labreanum_Z_uid58785	NC_008942	2	1	1	2	0
190192	Methanopyrus kandleri AV19	Archaea	Euryarchaeota	Methanopyrus_kandleri_AV19_uid57883	NC_003551	0	0	0	0	0
349307	Methanosaeta thermophila PT	Archaea	Euryarchaeota	Methanosaeta_thermophila_PT_uid58469	NC_008553	1	1	0	4	0
679901	Methanosalsum zhilinae DSM 4017	Archaea	Euryarchaeota	Methanosalsum_zhilinae_DSM_4017_uid68249	NC_015676	2	2	0	2	0
523846	Methanothermus fervidus DSM 2088	Archaea	Euryarchaeota	Methanothermus_fervidus_DSM_2088_uid60167	NC_014658	0	0	0	2	1
272844	Pyrococcus abyssi GE5	Archaea	Euryarchaeota	Pyrococcus_abyssi_GE5_uid62903	NC_000868,NC_001773	1	0	1	0	0
273075	Thermoplasma acidophilum DSM 1728	Archaea	Euryarchaeota	Thermoplasma_acidophilum_DSM_1728_uid61573	NC_002578	1	1	0	1	1
374847	Candidatus Korarchaeum cryptofilum OPF8	Archaea	Korarchaeota	Candidatus_Korarchaeum_cryptofilum_OPF8_uid58601	NC_010482	1	1	0	1	0
228908	Nanoarchaeum equitans Kin4-M	Archaea	Nanoarchaeota	Nanoarchaeum_equitans_Kin4_M_uid58009	NC_005213	0	0	0	0	0
436308	Nitrosopumilus maritimus SCM1	Archaea	Thaumarchaeota	Nitrosopumilus_maritimus_SCM1_uid58903	NC_010085	0	0	0	0	0
525909	Acidimicrobium ferrooxidans DSM 10331	Bacteria	Actinobacteria	Acidimicrobium_ferrooxidans_DSM_10331_uid59215	NC_013124	1	1	0	1	1
351607	Acidothermus cellulolyticus 11B	Bacteria	Actinobacteria	Acidothermus_cellulolyticus_11B_uid58501	NC_008578	2	1	1	1	0
644284	Arcanobacterium haemolyticum DSM 20595	Bacteria	Actinobacteria	Arcanobacterium_haemolyticum_DSM_20595_uid49489	NC_014218	1	1	0	1	0
367928	Bifidobacterium adolescentis ATCC 15703	Bacteria	Actinobacteria	Bifidobacterium_adolescentis_ATCC_15703_uid58559	NC_008618	2	1	1	2	0
446465	Brachybacterium faecium DSM 4810	Bacteria	Actinobacteria	Brachybacterium_faecium_DSM_4810_uid58649	NC_013172	4	2	2	0	0
479433	Catenulispora acidiphila DSM 44928	Bacteria	Actinobacteria	Catenulispora_acidiphila_DSM_44928_uid59077	NC_013131	1	1	0	1	0
443906	Clavibacter michiganensis subsp. michiganensis NCPPB 382	Bacteria	Actinobacteria	Clavibacter_michiganensis_NCPPB_382_uid61625	NC_009478,NC_009479,NC_009480	1	1	0	0	1
469383	Conexibacter woesei DSM 14684	Bacteria	Actinobacteria	Conexibacter_woesei_DSM_14684_uid43467	NC_013739	2	1	1	1	1
700015	Coriobacterium glomerans PW2	Bacteria	Actinobacteria	Coriobacterium_glomerans_PW2_uid65787	NC_015389	3	2	1	4	0
306537	Corynebacterium jeikeium K411	Bacteria	Actinobacteria	Corynebacterium_jeikeium_K411_uid58399	NC_003080,NC_007164	4	3	1	1	1
945711	Corynebacterium ulcerans 809	Bacteria	Actinobacteria	Corynebacterium_ulcerans_809_uid159659	NC_017317	3	2	1	0	0
469378	Cryptobacterium curtum DSM 15641	Bacteria	Actinobacteria	Cryptobacterium_curtum_DSM_15641_uid59041	NC_013170	3	1	2	0	0
298654	Frankia sp. EuI1c	Bacteria	Actinobacteria	Frankia_EuI1c_uid42615	NC_014666	1	1	0	1	1
526225	Geodermatophilus obscurus DSM 43160	Bacteria	Actinobacteria	Geodermatophilus_obscurus_DSM_43160_uid43725	NC_013757	2	2	0	2	0
1112204	Gordonia polyisoprenivorans VH2	Bacteria	Actinobacteria	Gordonia_polyisoprenivorans_VH2_uid86651	NC_016906,NC_016907	5	3	2	1	1
710696	Intrasporangium calvum DSM 43043	Bacteria	Actinobacteria	Intrasporangium_calvum_DSM_43043_uid61729	NC_014830	4	3	1	2	0
743718	Isoptericola variabilis 225	Bacteria	Actinobacteria	Isoptericola_variabilis_225_uid67501	NC_015588	2	2	0	0	0
266940	Kineococcus radiotolerans SRS30216	Bacteria	Actinobacteria	Kineococcus_radiotolerans_SRS30216_uid58067	NC_009660,NC_009664,NC_009806	3	2	1	0	1
1032480	Microlunatus phosphovorus NM-1	Bacteria	Actinobacteria	Microlunatus_phosphovorus_NM_1_uid68055	NC_015635	6	3	3	0	1
548479	Mobiluncus curtisii ATCC 43063	Bacteria	Actinobacteria	Mobiluncus_curtisii_ATCC_43063_uid49695	NC_014246	1	1	0	0	0
1198627	Mycobacterium massiliense str. GO 06	Bacteria	Actinobacteria	Mycobacterium_massiliense_GO_06_uid170732	NC_018150	3	2	1	1	1
479431	Nakamurella multipartita DSM 44233	Bacteria	Actinobacteria	Nakamurella_multipartita_DSM_44233_uid59221	NC_013235	4	2	2	2	1
196162	Nocardioides sp. JS614	Bacteria	Actinobacteria	Nocardioides_JS614_uid58149	NC_008697,NC_008699	6	4	2	1	0
267747	Propionibacterium acnes KPA171202	Bacteria	Actinobacteria	Propionibacterium_acnes_KPA171202_uid58101	NC_006085	2	2	0	0	1
767029	Propionibacterium propionicum F0230a	Bacteria	Actinobacteria	Propionibacterium_propionicum_F0230a_uid170533	NC_018142	2	2	0	2	0
680646	Rothia mucilaginosa DY-18	Bacteria	Actinobacteria	Rothia_mucilaginosa_uid43093	NC_013715	1	1	0	1	0
266117	Rubrobacter xylanophilus DSM 9941	Bacteria	Actinobacteria	Rubrobacter_xylanophilus_DSM_9941_uid58057	NC_008148	3	1	2	2	0
471857	Saccharomonospora viridis DSM 43017	Bacteria	Actinobacteria	Saccharomonospora_viridis_DSM_43017_uid59055	NC_013159	2	1	1	0	0
369723	Salinispora tropica CNB-440	Bacteria	Actinobacteria	Salinispora_tropica_CNB_440_uid58565	NC_009380	3	1	2	2	0
640132	Segniliparus rotundus DSM 44985	Bacteria	Actinobacteria	Segniliparus_rotundus_DSM_44985_uid49049	NC_014168	1	1	0	0	1
446470	Stackebrandtia nassauensis DSM 44728	Bacteria	Actinobacteria	Stackebrandtia_nassauensis_DSM_44728_uid46663	NC_013947	1	1	0	2	1
862751	Streptomyces sp. SirexAA-E	Bacteria	Actinobacteria	Streptomyces_SirexAA_E_uid72627	NC_015953	1	1	0	2	1
469371	Thermobispora bispora DSM 43833	Bacteria	Actinobacteria	Thermobispora_bispora_DSM_43833_uid48999	NC_014165	3	2	1	4	0
218496	Tropheryma whipplei TW08/27	Bacteria	Actinobacteria	Tropheryma_whipplei_TW08_27_uid57961	NC_004551	1	1	0	0	0
224324	Aquifex aeolicus VF5	Bacteria	Aquificae	Aquifex_aeolicus_VF5_uid57765	NC_000918,NC_001880	2	2	0	1	0
868864	Desulfurobacterium thermolithotrophum DSM 11699	Bacteria	Aquificae	Desulfurobacterium_thermolithotrophum_DSM_11699_uid63405	NC_015185	0	0	0	0	0
436114	Sulfurihydrogenibium sp. YO3AOP1	Bacteria	Aquificae	Sulfurihydrogenibium_YO3AOP1_uid58855	NC_010730	3	2	1	4	0
679935	Alistipes finegoldii DSM 17242	Bacteria	Bacteroidetes/Chlorobi group	Alistipes_finegoldii_DSM_17242_uid168180	NC_018011	0	0	0	1	0
226186	Bacteroides thetaiotaomicron VPI-5482	Bacteria	Bacteroidetes/Chlorobi group	Bacteroides_thetaiotaomicron_VPI_5482_uid62913	NC_004663,NC_004703	2	1	1	2	1
600809	Blattabacterium sp. (Periplaneta americana) str. BPLAN	Bacteria	Bacteroidetes/Chlorobi group	Blattabacterium__Periplaneta_americana__BPLAN_uid41287	NC_013418,NC_013419	1	1	0	0	0
1231626	Cardinium endosymbiont cEper1 of Encarsia pergandiella	Bacteria	Bacteroidetes/Chlorobi group	Cardinium_endosymbiont_cEper1_of_Encarsia_pergandiella_uid175524	NC_018605,NC_018606	0	0	0	0	0
485918	Chitinophaga pinensis DSM 2588	Bacteria	Bacteroidetes/Chlorobi group	Chitinophaga_pinensis_DSM_2588_uid59113	NC_013132	4	3	1	0	1
290318	Chlorobium phaeovibrioides DSM 265	Bacteria	Bacteroidetes/Chlorobi group	Chlorobium_phaeovibrioides_DSM_265_uid58129	NC_009337	0	0	0	1	0
880070	Cyclobacterium marinum DSM 745	Bacteria	Bacteroidetes/Chlorobi group	Cyclobacterium_marinum_DSM_745_uid71485	NC_015914	7	5	2	1	0
269798	Cytophaga hutchinsonii ATCC 33406	Bacteria	Bacteroidetes/Chlorobi group	Cytophaga_hutchinsonii_ATCC_33406_uid57651	NC_008255	4	2	2	1	1
929562	Emticicia oligotrophica DSM 17448	Bacteria	Bacteroidetes/Chlorobi group	Emticicia_oligotrophica_DSM_17448_uid177079	NC_018742,NC_018743,NC_018744,NC_018745,NC_018748,NC_018749	2	2	0	2	0
880071	Flexibacter litoralis DSM 6794	Bacteria	Bacteroidetes/Chlorobi group	Flexibacter_litoralis_DSM_6794_uid168257	NC_018018	1	1	0	0	0
755732	Fluviicola taffensis DSM 16823	Bacteria	Bacteroidetes/Chlorobi group	Fluviicola_taffensis_DSM_16823_uid65271	NC_015321	3	2	1	1	1
760192	Haliscomenobacter hydrossis DSM 1100	Bacteria	Bacteroidetes/Chlorobi group	Haliscomenobacter_hydrossis_DSM_1100_uid66777	NC_015510,NC_015511,NC_015512,NC_015513	5	4	1	3	1
983544	Lacinutrix sp. 5H-3-7-4	Bacteria	Bacteroidetes/Chlorobi group	Lacinutrix_5H_3_7_4_uid68067	NC_015638	2	1	1	0	0
649349	Leadbetterella byssophila DSM 17132	Bacteria	Bacteroidetes/Chlorobi group	Leadbetterella_byssophila_DSM_17132_uid60161	NC_014655	4	3	1	1	0
1191523	Melioribacter roseus P3M-2	Bacteria	Bacteroidetes/Chlorobi group	Melioribacter_roseus_P3M_uid170941	NC_018178	3	3	0	0	0
709991	Odoribacter splanchnicus DSM 220712	Bacteria	Bacteroidetes/Chlorobi group	Odoribacter_splanchnicus_DSM_20712_uid63397	NC_015160	3	2	1	1	0
926562	Owenweeksia hongkongensis DSM 17368	Bacteria	Bacteroidetes/Chlorobi group	Owenweeksia_hongkongensis_DSM_17368_uid82951	NC_016599	3	3	0	0	0
435591	Parabacteroides distasonis ATCC 8503	Bacteria	Bacteroidetes/Chlorobi group	Parabacteroides_distasonis_ATCC_8503_uid58301	NC_009615	2	1	1	1	1
485917	Pedobacter heparinus DSM 2366	Bacteria	Bacteroidetes/Chlorobi group	Pedobacter_heparinus_DSM_2366_uid59111	NC_013061	3	2	1	0	1
879243	Porphyromonas asaccharolytica DSM 20707	Bacteria	Bacteroidetes/Chlorobi group	Porphyromonas_asaccharolytica_DSM_20707_uid66603	NC_015501	2	1	1	1	0
264731	Prevotella ruminicola 23	Bacteria	Bacteroidetes/Chlorobi group	Prevotella_ruminicola_23_uid47507	NC_014033	1	0	1	1	0
518766	Rhodothermus marinus DSM 4252	Bacteria	Bacteroidetes/Chlorobi group	Rhodothermus_marinus_DSM_4252_uid41729	NC_013501,NC_013502	4	2	2	0	0
984262	Saprospira grandis str. Lewin	Bacteria	Bacteroidetes/Chlorobi group	Saprospira_grandis_Lewin_uid89375	NC_016936,NC_016940	1	1	0	0	0
865938	Weeksella virosa DSM 16922	Bacteria	Bacteroidetes/Chlorobi group	Weeksella_virosa_DSM_16922_uid63627	NC_015144	4	2	2	1	0
511051	Caldisericum exile AZM16c01	Bacteria	Caldiserica	Caldisericum_exile_AZM16c01_uid158173	NC_017096	1	1	0	3	0
349741	Akkermansia muciniphila ATCC BAA-835	Bacteria	Chlamydiae/Verrucomicrobia group	Akkermansia_muciniphila_ATCC_BAA_835_uid58985	NC_010655	4	1	3	1	2
929557	Chlamydophila psittaci RD1	Bacteria	Chlamydiae/Verrucomicrobia group	Chlamydophila_psittaci_RD1_uid162063	NC_014796,NC_014797	1	0	1	0	0
583355	Coraliomargarita akajimensis DSM 45221	Bacteria	Chlamydiae/Verrucomicrobia group	Coraliomargarita_akajimensis_DSM_45221_uid47079	NC_014008	3	2	1	0	0
481448	Methylacidiphilum infernorum V4	Bacteria	Chlamydiae/Verrucomicrobia group	Methylacidiphilum_infernorum_V4_uid59161	NC_010794	2	1	1	2	1
452637	Opitutus terrae PB90-1	Bacteria	Chlamydiae/Verrucomicrobia group	Opitutus_terrae_PB90_1_uid58965	NC_010571	5	3	2	0	0
331113	Simkania negevensis Z	Bacteria	Chlamydiae/Verrucomicrobia group	Simkania_negevensis_Z_uid68451	NC_015710,NC_015713	3	1	2	2	0
716544	Waddlia chondrophila WSU 86-1044	Bacteria	Chlamydiae/Verrucomicrobia group	Waddlia_chondrophila_WSU_86_1044_uid49531	NC_014225,NC_014226	4	2	2	0	0
926569	Anaerolinea thermophila UNI-1	Bacteria	Chloroflexi	Anaerolinea_thermophila_UNI_1_uid62245	NC_014960	2	1	1	4	0
926550	Caldilinea aerophila DSM 14535 = NBRC 104270	Bacteria	Chloroflexi	Caldilinea_aerophila_DSM_14535___NBRC_104270_uid158165	NC_017079	5	2	3	4	0
324602	Chloroflexus aurantiacus J-10-fl	Bacteria	Chloroflexi	Chloroflexus_aurantiacus_J_10_fl_uid57657	NC_010175	4	2	2	1	0
216389	Dehalococcoides sp. BAV1	Bacteria	Chloroflexi	Dehalococcoides_BAV1_uid58477	NC_009455	1	1	0	0	0
552811	Dehalogenimonas lykanthroporepellens BL-DC-9	Bacteria	Chloroflexi	Dehalogenimonas_lykanthroporepellens_BL_DC_9_uid48131	NC_014314	1	1	0	1	0
316274	Herpetosiphon aurantiacus DSM 785	Bacteria	Chloroflexi	Herpetosiphon_aurantiacus_DSM_785_uid58599	NC_009972,NC_009973,NC_009974	3	1	2	1	1
479434	Sphaerobacter thermophilus DSM 20745	Bacteria	Chloroflexi	Sphaerobacter_thermophilus_DSM_20745_uid41997	NC_013523,NC_013524	6	3	3	2	0
653733	Desulfurispirillum indicum S5	Bacteria	Chrysiogenetes	Desulfurispirillum_indicum_S5_uid45897	NC_014836	4	3	1	1	0
329726	Acaryochloris marina MBIC11017	Bacteria	Cyanobacteria	Acaryochloris_marina_MBIC11017_uid58167	NC_009925,NC_009926,NC_009927,NC_009928,NC_009929,NC_009930,NC_009931,NC_009932,NC_009933,NC_009934	2	2	0	2	0
46234	Anabaena sp. 90	Bacteria	Cyanobacteria	Anabaena_90_uid179383	NC_019427,NC_019428,NC_019429,NC_019439,NC_019440	2	2	0	3	2
240292	Anabaena variabilis ATCC 29413	Bacteria	Cyanobacteria	Anabaena_variabilis_ATCC_29413_uid58043	NC_007410,NC_007411,NC_007412,NC_007413,NC_014000	6	2	4	9	3
713887	cyanobacterium UCYN-A	Bacteria	Cyanobacteria	cyanobacterium_UCYN_A_uid43697	NC_013771	2	2	0	0	0
43989	Cyanothece sp. ATCC 51142	Bacteria	Cyanobacteria	Cyanothece_ATCC_51142_uid59013	NC_010539,NC_010541,NC_010542,NC_010543,NC_010546,NC_010547	4	3	1	10	1
65393	Cyanothece sp. PCC 7424	Bacteria	Cyanobacteria	Cyanothece_PCC_7424_uid59025	NC_011729,NC_011730,NC_011732,NC_011733,NC_011734,NC_011737,NC_011738	5	2	3	6	0
395961	Cyanothece sp. PCC 7425	Bacteria	Cyanobacteria	Cyanothece_PCC_7425_uid59435	NC_011880,NC_011882,NC_011884,NC_011885	7	2	5	5	0
497965	Cyanothece sp. PCC 7822	Bacteria	Cyanobacteria	Cyanothece_PCC_7822_uid52547	NC_014501,NC_014502,NC_014503,NC_014504,NC_014533,NC_014534,NC_014535	5	2	3	4	1
41431	Cyanothece sp. PCC 8801	Bacteria	Cyanobacteria	Cyanothece_PCC_8801_uid59027	NC_011721,NC_011723,NC_011726,NC_011727	2	2	0	3	1
395962	Cyanothece sp. PCC 8802	Bacteria	Cyanobacteria	Cyanothece_PCC_8802_uid59143	NC_013160,NC_013161,NC_013163,NC_013167,NC_013168	2	2	0	4	1
251221	Gloeobacter violaceus PCC 7421	Bacteria	Cyanobacteria	Gloeobacter_violaceus_PCC_7421_uid58011	NC_005125	2	2	0	1	1
449447	Microcystis aeruginosa NIES-843	Bacteria	Cyanobacteria	Microcystis_aeruginosa_NIES_843_uid59101	NC_010296	3	2	1	4	1
551115	'Nostoc azollae' 0708	Bacteria	Cyanobacteria	_Nostoc_azollae__0708_uid49725	NC_014248,NC_014249,NC_014250	2	2	0	3	1
63737	Nostoc punctiforme PCC 73102	Bacteria	Cyanobacteria	Nostoc_punctiforme_PCC_73102_uid57767	NC_010628,NC_010629,NC_010630,NC_010631,NC_010632,NC_010633	5	2	3	2	2
103690	Nostoc sp. PCC 7120	Bacteria	Cyanobacteria	Nostoc_PCC_7120_uid57803	NC_003240,NC_003241,NC_003267,NC_003270,NC_003272,NC_003273,NC_003276	8	4	4	3	2
146891	Prochlorococcus marinus str. AS9601	Bacteria	Cyanobacteria	Prochlorococcus_marinus_AS9601_uid58307	NC_008816	1	1	0	0	0
93059	Prochlorococcus marinus str. MIT 9211	Bacteria	Cyanobacteria	Prochlorococcus_marinus_MIT_9211_uid58309	NC_009976	1	1	0	0	0
93060	Prochlorococcus marinus str. MIT 9215	Bacteria	Cyanobacteria	Prochlorococcus_marinus_MIT_9215_uid58819	NC_009840	1	1	0	0	0
167546	Prochlorococcus marinus str. MIT 9301	Bacteria	Cyanobacteria	Prochlorococcus_marinus_MIT_9301_uid58437	NC_009091	1	1	0	0	0
59922	Prochlorococcus marinus str. MIT 9303	Bacteria	Cyanobacteria	Prochlorococcus_marinus_MIT_9303_uid58305	NC_008820	1	1	0	0	0
74546	Prochlorococcus marinus str. MIT 9312	Bacteria	Cyanobacteria	Prochlorococcus_marinus_MIT_9312_uid58357	NC_007577	1	1	0	0	0
74547	Prochlorococcus marinus str. MIT 9313	Bacteria	Cyanobacteria	Prochlorococcus_marinus_MIT_9313_uid57773	NC_005071	1	1	0	0	0
167542	Prochlorococcus marinus str. MIT 9515	Bacteria	Cyanobacteria	Prochlorococcus_marinus_MIT_9515_uid58313	NC_008817	1	1	0	0	0
167555	Prochlorococcus marinus str. NATL1A	Bacteria	Cyanobacteria	Prochlorococcus_marinus_NATL1A_uid58423	NC_008819	1	1	0	0	0
59920	Prochlorococcus marinus str. NATL2A	Bacteria	Cyanobacteria	Prochlorococcus_marinus_NATL2A_uid58359	NC_007335	1	1	0	0	0
167539	Prochlorococcus marinus subsp. marinus str. CCMP1375	Bacteria	Cyanobacteria	Prochlorococcus_marinus_CCMP1375_uid57995	NC_005042	1	1	0	0	0
59919	Prochlorococcus marinus subsp. pastoris str. CCMP1986	Bacteria	Cyanobacteria	Prochlorococcus_marinus_pastoris_CCMP1986_uid57761	NC_005072	1	1	0	0	0
269084	Synechococcus elongatus PCC 6301	Bacteria	Cyanobacteria	Synechococcus_elongatus_PCC_6301_uid58235	NC_006576	2	2	0	1	1
1140	Synechococcus elongatus PCC 7942	Bacteria	Cyanobacteria	Synechococcus_elongatus_PCC_7942_uid58045	NC_007595,NC_007604	2	2	0	1	1
64471	Synechococcus sp. CC9311	Bacteria	Cyanobacteria	Synechococcus_CC9311_uid58123	NC_008319	1	1	0	0	0
110662	Synechococcus sp. CC9605	Bacteria	Cyanobacteria	Synechococcus_CC9605_uid58319	NC_007516	2	1	1	0	0
316279	Synechococcus sp. CC9902	Bacteria	Cyanobacteria	Synechococcus_CC9902_uid58323	NC_007513	1	1	0	0	0
321332	Synechococcus sp. JA-2-3B'a(2-13)	Bacteria	Cyanobacteria	Synechococcus_JA_2_3B_a_2_13__uid58537	NC_007776	2	2	0	2	0
321327	Synechococcus sp. JA-3-3Ab	Bacteria	Cyanobacteria	Synechococcus_JA_3_3Ab_uid58535	NC_007775	2	2	0	2	0
32049	Synechococcus sp. PCC 7002	Bacteria	Cyanobacteria	Synechococcus_PCC_7002_uid59137	NC_010474,NC_010475,NC_010476,NC_010477,NC_010478,NC_010479,NC_010480	2	2	0	4	1
316278	Synechococcus sp. RCC307	Bacteria	Cyanobacteria	Synechococcus_RCC307_uid61609	NC_009482	1	1	0	0	0
32051	Synechococcus sp. WH 7803	Bacteria	Cyanobacteria	Synechococcus_WH_7803_uid61607	NC_009481	1	1	0	0	0
84588	Synechococcus sp. WH 8102	Bacteria	Cyanobacteria	Synechococcus_WH_8102_uid61581	NC_005070	1	1	0	0	0
1148	Synechocystis sp. PCC 6803	Bacteria	Cyanobacteria	Synechocystis_PCC_6803_uid159873	NC_017277	4	2	2	4	1
1080228	Synechocystis sp. PCC 6803 substr. GT-I	Bacteria	Cyanobacteria	Synechocystis_PCC_6803_substr__PCC_P_uid157913	NC_017038	4	2	2	4	1
1080229	Synechocystis sp. PCC 6803 substr. PCC-N	Bacteria	Cyanobacteria	Synechocystis_PCC_6803_substr__GT_I_uid158059	NC_017052	4	2	2	4	1
1080230	Synechocystis sp. PCC 6803 substr. PCC-P	Bacteria	Cyanobacteria	Synechocystis_PCC_6803_substr__PCC_N_uid159835	NC_017039	4	2	2	4	1
197221	Thermosynechococcus elongatus BP-1	Bacteria	Cyanobacteria	Thermosynechococcus_elongatus_BP_1_uid57907	NC_004113	3	1	2	2	0
203124	Trichodesmium erythraeum IMS101	Bacteria	Cyanobacteria	Trichodesmium_erythraeum_IMS101_uid57925	NC_008312	2	2	0	2	0
717231	Flexistipes sinusarabici DSM 4947	Bacteria	Deferribacteres	Flexistipes_sinusarabici_DSM_4947_uid68147	NC_015672	2	1	1	0	0
319795	Deinococcus geothermalis DSM 11300	Bacteria	Deinococcus-Thermus	Deinococcus_geothermalis_DSM_11300_uid58275	NC_008010,NC_008025,NC_009939	6	4	2	0	1
869210	Marinithermus hydrothermalis DSM 14884	Bacteria	Deinococcus-Thermus	Marinithermus_hydrothermalis_DSM_14884_uid65783	NC_015387	4	3	1	0	0
649638	Truepera radiovictrix DSM 17093	Bacteria	Deinococcus-Thermus	Truepera_radiovictrix_DSM_17093_uid49533	NC_014221	3	2	1	2	0
515635	Dictyoglomus turgidum DSM 6724	Bacteria	Dictyoglomi	Dictyoglomus_turgidum_DSM_6724_uid59177	NC_011661	0	0	0	1	0
445932	Elusimicrobium minutum Pei191	Bacteria	Elusimicrobia	Elusimicrobium_minutum_Pei191_uid58949	NC_010644	1	1	0	2	0
471821	uncultured Termite group 1 bacterium phylotype Rs-D17	Bacteria	Elusimicrobia	uncultured_Termite_group_1_bacterium_phylotype_Rs_D17_uid59059	NS_000191,NS_000192,NS_000193,NS_000194	0	0	0	0	0
981222	Candidatus Chloracidobacterium thermophilum B	Bacteria	Fibrobacteres/Acidobacteria group	Candidatus_Chloracidobacterium_thermophilum_B_uid73587	NC_016024,NC_016025	1	1	0	1	0
204669	Candidatus Koribacter versatilis Ellin345	Bacteria	Fibrobacteres/Acidobacteria group	Candidatus_Koribacter_versatilis_Ellin345_uid58479	NC_008009	1	1	0	0	1
234267	Candidatus Solibacter usitatus Ellin6076	Bacteria	Fibrobacteres/Acidobacteria group	Candidatus_Solibacter_usitatus_Ellin6076_uid58139	NC_008536	2	2	0	0	1
59374	Fibrobacter succinogenes subsp. succinogenes S85	Bacteria	Fibrobacteres/Acidobacteria group	Fibrobacter_succinogenes_S85_uid41169	NC_013410	1	0	1	0	0
401053	Terriglobus saanensis SP1PR4	Bacteria	Fibrobacteres/Acidobacteria group	Terriglobus_saanensis_SP1PR4_uid53251	NC_014963	0	0	0	0	1
931626	Acetobacterium woodii DSM 1030	Bacteria	Firmicutes	Acetobacterium_woodii_DSM_1030_uid88073	NC_016894	2	1	1	5	1
574087	Acetohalobium arabaticum DSM 5501	Bacteria	Firmicutes	Acetohalobium_arabaticum_DSM_5501_uid51423	NC_014378	2	1	1	3	0
591001	Acidaminococcus fermentans DSM 20731	Bacteria	Firmicutes	Acidaminococcus_fermentans_DSM_20731_uid43471	NC_013740	3	1	2	1	0
866775	Aerococcus urinae ACS-120-V-Col10a	Bacteria	Firmicutes	Aerococcus_urinae_ACS_120_V_Col10a_uid64757	NC_015278	2	1	1	2	0
521098	Alicyclobacillus acidocaldarius subsp. acidocaldarius DSM 446	Bacteria	Firmicutes	Alicyclobacillus_acidocaldarius_DSM_446_uid59199	NC_013205,NC_013206,NC_013207,NC_013208	2	2	0	1	1
350688	Alkaliphilus oremlandii OhILAs	Bacteria	Firmicutes	Alkaliphilus_oremlandii_OhILAs_uid58495	NC_009922	5	2	3	1	0
429009	Ammonifex degensii KC4	Bacteria	Firmicutes	Ammonifex_degensii_KC4_uid41053	NC_013385,NC_013386	1	1	0	0	1
698758	Amphibacillus xylanus NBRC 15112	Bacteria	Firmicutes	Amphibacillus_xylanus_NBRC_15112_uid176453	NC_018704	5	1	4	2	0
525919	Anaerococcus prevotii DSM 20548	Bacteria	Firmicutes	Anaerococcus_prevotii_DSM_20548_uid59219	NC_013164,NC_013171	4	2	2	1	0
326423	Bacillus amyloliquefaciens FZB42	Bacteria	Firmicutes	Bacillus_amyloliquefaciens_FZB42_uid58271	NC_009725	3	1	2	1	0
66692	Bacillus clausii KSM-K16	Bacteria	Firmicutes	Bacillus_clausii_KSM_K16_uid58237	NC_006582	4	2	2	2	0
358681	Brevibacillus brevis NBRC 100599	Bacteria	Firmicutes	Brevibacillus_brevis_NBRC_100599_uid59175	NC_012491	2	1	1	1	1
515622	Butyrivibrio proteoclasticus B316	Bacteria	Firmicutes	Butyrivibrio_proteoclasticus_B316_uid51489	NC_014387,NC_014388,NC_014389,NC_014390	2	1	1	1	0
608506	Caldicellulosiruptor obsidiansis OB47	Bacteria	Firmicutes	Caldicellulosiruptor_obsidiansis_OB47_uid51501	NC_014392	2	1	1	1	0
1041504	Candidatus Arthromitus sp. SFB-rat-Yit	Bacteria	Firmicutes	Candidatus_Arthromitus_SFB_rat_Yit_uid73425	NC_016012	2	1	1	2	0
246194	Carboxydothermus hydrogenoformans Z-2901	Bacteria	Firmicutes	Carboxydothermus_hydrogenoformans_Z_2901_uid57821	NC_007503	2	1	1	0	0
699246	Clostridiales genomosp. BVAB3 str. UPII9-5	Bacteria	Firmicutes	Clostridiales_genomosp__BVAB3_UPII9_5_uid46219	NC_013895	3	1	2	3	0
441771	Clostridium botulinum A str. Hall	Bacteria	Firmicutes	Clostridium_botulinum_A_Hall_uid58931	NC_009698	2	1	1	6	0
645462	Clostridium difficile CD196	Bacteria	Firmicutes	Clostridium_difficile_CD196_uid41017	NC_013315	3	1	2	5	1
642492	Clostridium lentocellum DSM 5427	Bacteria	Firmicutes	Clostridium_lentocellum_DSM_5427_uid49117	NC_015275	2	1	1	4	0
357809	Clostridium phytofermentans ISDg	Bacteria	Firmicutes	Clostridium_phytofermentans_ISDg_uid58519	NC_010001	3	1	2	10	0
499177	Clostridium sticklandii DSM 519	Bacteria	Firmicutes	Clostridium_sticklandii_DSM_519_uid59585	NC_014614	2	1	1	2	0
212717	Clostridium tetani E88	Bacteria	Firmicutes	Clostridium_tetani_E88_uid57683	NC_004557,NC_004565	2	1	1	3	0
637887	Clostridium thermocellum DSM 1313	Bacteria	Firmicutes	Clostridium_thermocellum_DSM_1313_uid161989	NC_017304	2	1	1	2	0
309798	Coprothermobacter proteolyticus DSM 5265	Bacteria	Firmicutes	Coprothermobacter_proteolyticus_DSM_5265_uid59253	NC_011295	2	1	1	2	0
138119	Desulfitobacterium hafniense Y51	Bacteria	Firmicutes	Desulfitobacterium_hafniense_Y51_uid58605	NC_007907	8	2	6	2	0
349161	Desulfotomaculum reducens MI-1	Bacteria	Firmicutes	Desulfotomaculum_reducens_MI_1_uid58277	NC_009253	3	2	1	1	0
650150	Erysipelothrix rhusiopathiae str. Fujisawa	Bacteria	Firmicutes	Erysipelothrix_rhusiopathiae_Fujisawa_uid68021	NC_015601	4	1	3	3	0
663278	Ethanoligenens harbinense YUAN-3	Bacteria	Firmicutes	Ethanoligenens_harbinense_YUAN_3_uid46255	NC_014828	3	2	1	7	1
360911	Exiguobacterium sp. AT1b	Bacteria	Firmicutes	Exiguobacterium_AT1b_uid59093	NC_012673	4	2	2	1	1
334413	Finegoldia magna ATCC 29328	Bacteria	Firmicutes	Finegoldia_magna_ATCC_29328_uid58867	NC_010371,NC_010376	3	1	2	2	0
572479	Halanaerobium praevalens DSM 2228	Bacteria	Firmicutes	Halanaerobium_praevalens_DSM_2228_uid161959	NC_017455	3	2	1	1	0
498761	Heliobacterium modesticaldum Ice1	Bacteria	Firmicutes	Heliobacterium_modesticaldum_Ice1_uid58279	NC_010337	2	1	1	1	0
562970	Kyrpidia tusciae DSM 2912	Bacteria	Firmicutes	Kyrpidia_tusciae_DSM_2912_uid48361	NC_014098	3	2	1	1	1
712938	Lactobacillus fermentum CECT 5716	Bacteria	Firmicutes	Lactobacillus_fermentum_CECT_5716_uid162003	NC_017465	3	1	2	1	0
405566	Lactobacillus helveticus DPC 4571	Bacteria	Firmicutes	Lactobacillus_helveticus_DPC_4571_uid58761	NC_010080	3	2	1	5	0
568703	Lactobacillus rhamnosus GG	Bacteria	Firmicutes	Lactobacillus_rhamnosus_GG_uid161983	NC_017482	4	1	3	7	0
420890	Lactococcus garvieae Lg2	Bacteria	Firmicutes	Lactococcus_garvieae_Lg2_uid161935	NC_017490	4	2	2	6	0
881621	Listeria ivanovii subsp. ivanovii PAM 55	Bacteria	Firmicutes	Listeria_ivanovii_PAM_55_uid73473	NC_016011	2	1	1	4	1
458233	Macrococcus caseolyticus JCSC5402	Bacteria	Firmicutes	Macrococcus_caseolyticus_JCSC5402_uid59003	NC_011995,NC_011996,NC_011997,NC_011998,NC_011999,NC_012000,NC_012001,NC_012002,NC_012003	4	2	2	0	0
697281	Mahella australiensis 50-1 BON	Bacteria	Firmicutes	Mahella_australiensis_50_1_BON_uid66917	NC_015520	3	1	2	1	0
1064535	Megasphaera elsdenii DSM 20460	Bacteria	Firmicutes	Megasphaera_elsdenii_DSM_20460_uid71135	NC_015873	4	1	3	0	0
1090974	Melissococcus plutonius DAT561	Bacteria	Firmicutes	Melissococcus_plutonius_DAT561_uid89371	NC_016938,NC_018265	4	2	2	6	0
264732	Moorella thermoacetica ATCC 39073	Bacteria	Firmicutes	Moorella_thermoacetica_ATCC_39073_uid58051	NC_007644	2	1	1	1	0
457570	Natranaerobius thermophilus JW/NM-WN-LF	Bacteria	Firmicutes	Natranaerobius_thermophilus_JW_NM_WN_LF_uid59001	NC_010715,NC_010718,NC_010724	3	2	1	1	0
203123	Oenococcus oeni PSU-1	Bacteria	Firmicutes	Oenococcus_oeni_PSU_1_uid59417	NC_008528	2	1	1	2	0
693746	Oscillibacter valericigenes Sjm18-20	Bacteria	Firmicutes	Oscillibacter_valericigenes_uid73895	NC_016046,NC_016048	2	1	1	2	0
324057	Paenibacillus sp. JDR-2	Bacteria	Firmicutes	Paenibacillus_JDR_2_uid59021	NC_012914	3	2	1	1	1
697329	Ruminococcus albus 7	Bacteria	Firmicutes	Ruminococcus_albus_7_uid51721	NC_014824,NC_014825,NC_014826,NC_014827,NC_014833	3	1	2	2	0
546271	Selenomonas sputigena ATCC 35185	Bacteria	Firmicutes	Selenomonas_sputigena_ATCC_35185_uid55329	NC_015437	5	2	3	1	0
617121	Streptococcus dysgalactiae subsp. equisimilis RE378	Bacteria	Firmicutes	Streptococcus_dysgalactiae_equisimilis_RE378_uid176684	NC_018712	3	2	1	1	0
591365	Streptococcus intermedius JTH08	Bacteria	Firmicutes	Streptococcus_intermedius_JTH08_uid168614	NC_018073	3	1	2	4	0
511691	Streptococcus mutans NN2025	Bacteria	Firmicutes	Streptococcus_mutans_NN2025_uid46353	NC_013928	2	1	1	2	0
981540	Streptococcus pasteurianus ATCC 43144	Bacteria	Firmicutes	Streptococcus_pasteurianus_ATCC_43144_uid68019	NC_015600	3	1	2	2	1
347253	Streptococcus salivarius JIM8777	Bacteria	Firmicutes	Streptococcus_salivarius_JIM8777_uid162145	NC_017595	2	2	0	5	0
264199	Streptococcus thermophilus LMG 18311	Bacteria	Firmicutes	Streptococcus_thermophilus_LMG_18311_uid58219	NC_006448	2	2	0	3	0
679936	Sulfobacillus acidophilus DSM 10332	Bacteria	Firmicutes	Sulfobacillus_acidophilus_DSM_10332_uid88061	NC_016884,NC_016888	2	2	0	1	1
292459	Symbiobacterium thermophilum IAM 14863	Bacteria	Firmicutes	Symbiobacterium_thermophilum_IAM_14863_uid58165	NC_006177	3	1	2	2	0
335541	Syntrophomonas wolfei subsp. wolfei str. Goettingen	Bacteria	Firmicutes	Syntrophomonas_wolfei_Goettingen_uid58179	NC_008346	2	1	1	2	0
1209989	Tepidanaerobacter acetatoxydans Re1	Bacteria	Firmicutes	Tepidanaerobacter_Re1_uid66873	NC_015519	2	1	1	2	0
644966	Thermaerobacter marianensis DSM 12885	Bacteria	Firmicutes	Thermaerobacter_marianensis_DSM_12885_uid61727	NC_014831	6	4	2	1	0
697303	Thermoanaerobacter wiegelii Rt8.B1	Bacteria	Firmicutes	Thermoanaerobacter_wiegelii_Rt8_B1_uid52581	NC_015958	1	1	0	4	1
747365	Thermodesulfobium narugense DSM 14796	Bacteria	Firmicutes	Thermodesulfobium_narugense_DSM_14796_uid66601	NC_015499	1	1	0	0	1
479436	Veillonella parvula DSM 2008	Bacteria	Firmicutes	Veillonella_parvula_DSM_2008_uid41927	NC_013520	4	1	3	0	0
1045854	Weissella koreensis KACC 15510	Bacteria	Firmicutes	Weissella_koreensis_KACC_15510_uid68837	NC_015756,NC_015759	5	3	2	1	0
572544	Ilyobacter polytropus DSM 2926	Bacteria	Fusobacteria	Ilyobacter_polytropus_DSM_2926_uid59769	NC_014632,NC_014633,NC_014634	2	1	1	0	0
519441	Streptobacillus moniliformis DSM 12112	Bacteria	Fusobacteria	Streptobacillus_moniliformis_DSM_12112_uid41863	NC_013515,NC_013516	2	1	1	1	0
379066	Gemmatimonas aurantiaca T-27	Bacteria	Gemmatimonadetes	Gemmatimonas_aurantiaca_T_27_uid58813	NC_012489	4	3	1	0	1
330214	Candidatus Nitrospira defluvii	Bacteria	Nitrospirae	Candidatus_Nitrospira_defluvii_uid51175	NC_014355	1	1	0	3	0
1162668	Leptospirillum ferrooxidans C2-3	Bacteria	Nitrospirae	Leptospirillum_ferrooxidans_C2_3_uid158171	NC_017094	1	1	0	2	1
289376	Thermodesulfovibrio yellowstonii DSM 11347	Bacteria	Nitrospirae	Thermodesulfovibrio_yellowstonii_DSM_11347_uid59257	NC_011296	1	1	0	2	0
575540	Isosphaera pallida ATCC 43644	Bacteria	Planctomycetes	Isosphaera_pallida_ATCC_43644_uid62207	NC_014957,NC_014962	5	3	2	2	0
1142394	Phycisphaera mikurensis NBRC 102666	Bacteria	Planctomycetes	Phycisphaera_mikurensis_NBRC_102666_uid157331	NC_017080,NC_017081	3	1	2	0	0
530564	Pirellula staleyi DSM 6068	Bacteria	Planctomycetes	Pirellula_staleyi_DSM_6068_uid43209	NC_013720	4	2	2	1	1
756272	Planctomyces brasiliensis DSM 5305	Bacteria	Planctomycetes	Planctomyces_brasiliensis_DSM_5305_uid60583	NC_015174	2	1	1	0	0
521674	Planctomyces limnophilus DSM 3776	Bacteria	Planctomycetes	Planctomyces_limnophilus_DSM_3776_uid48643	NC_014148,NC_014149	2	1	1	1	1
243090	Rhodopirellula baltica SH 1	Bacteria	Planctomycetes	Rhodopirellula_baltica_SH_1_uid61589	NC_005027	3	2	1	0	0
380394	Acidithiobacillus ferrooxidans ATCC 53993	Bacteria	Proteobacteria	Acidithiobacillus_ferrooxidans_ATCC_53993_uid58613	NC_011206	6	4	2	5	2
400667	Acinetobacter baumannii ATCC 17978	Bacteria	Proteobacteria	Acinetobacter_baumannii_ATCC_17978_uid58731	NC_009083,NC_009084,NC_009085	2	2	0	1	1
380703	Aeromonas hydrophila subsp. hydrophila ATCC 7966	Bacteria	Proteobacteria	Aeromonas_hydrophila_ATCC_7966_uid58617	NC_008570	3	2	1	1	1
393595	Alcanivorax borkumensis SK2	Bacteria	Proteobacteria	Alcanivorax_borkumensis_SK2_uid58169	NC_008260	3	3	0	0	0
572477	Allochromatium vinosum DSM 180	Bacteria	Proteobacteria	Allochromatium_vinosum_DSM_180_uid46083	NC_013851,NC_013852,NC_013862	3	2	1	3	1
744985	alpha proteobacterium HIMB59	Bacteria	Proteobacteria	alpha_proteobacterium_HIMB59_uid175778	NC_018644	0	0	0	0	0
290397	Anaeromyxobacter dehalogenans 2CP-C	Bacteria	Proteobacteria	Anaeromyxobacter_dehalogenans_2CP_C_uid58135	NC_007760	2	2	0	3	1
574556	Anaplasma centrale str. Israel	Bacteria	Proteobacteria	Anaplasma_centrale_Israel_uid42155	NC_013532	0	0	0	0	0
944546	Arcobacter butzleri ED-1	Bacteria	Proteobacteria	Arcobacter_butzleri_ED_1_uid158699	NC_017187	4	2	2	0	0
62928	Azoarcus sp. BH72	Bacteria	Proteobacteria	Azoarcus_BH72_uid61603	NC_008702	3	3	0	1	0
438753	Azorhizobium caulinodans ORS 571	Bacteria	Proteobacteria	Azorhizobium_caulinodans_ORS_571_uid58905	NC_009937	4	2	2	4	1
137722	Azospirillum sp. B510	Bacteria	Proteobacteria	Azospirillum_B510_uid46085	NC_013854,NC_013855,NC_013856,NC_013857,NC_013858,NC_013859,NC_013860	3	2	1	1	1
862908	Bacteriovorax marinus SJ	Bacteria	Proteobacteria	Bacteriovorax_marinus_SJ_uid82341	NC_016620,NC_019100	2	2	0	0	0
283165	Bartonella quintana str. Toulouse	Bacteria	Proteobacteria	Bartonella_quintana_Toulouse_uid57635	NC_005955	0	0	0	0	0
374463	Baumannia cicadellinicola str. Hc (Homalodisca coagulata)	Bacteria	Proteobacteria	Baumannia_cicadellinicola_Hc__Homalodisca_coagulata__uid58111	NC_007984	0	0	0	0	0
264462	Bdellovibrio bacteriovorus HD100	Bacteria	Proteobacteria	Bdellovibrio_bacteriovorus_HD100_uid61595	NC_005363	3	3	0	1	0
568706	Bordetella pertussis 18323	Bacteria	Proteobacteria	Bordetella_parapertussis_18323_uid175569	NC_018518	2	1	1	0	1
372461	Buchnera aphidicola BCc	Bacteria	Proteobacteria	Buchnera_aphidicola_Cc__Cinara_cedri__uid58579	NC_008513,NC_011878	0	0	0	0	0
107806	Buchnera aphidicola str. APS (Acyrthosiphon pisum)	Bacteria	Proteobacteria	Buchnera_aphidicola_APS__Acyrthosiphon_pisum__uid57805	NC_002252,NC_002253,NC_002528	0	0	0	0	0
224915	Buchnera aphidicola str. Bp (Baizongia pistaciae)	Bacteria	Proteobacteria	Buchnera_aphidicola_Bp__Baizongia_pistaciae__uid57827	NC_004545,NC_004555	0	0	0	0	0
320372	Burkholderia pseudomallei 1710b	Bacteria	Proteobacteria	Burkholderia_pseudomallei_1710b_uid58391	NC_007434,NC_007435	3	2	1	2	1
360106	Campylobacter fetus subsp. fetus 82-40	Bacteria	Proteobacteria	Campylobacter_fetus_82_40_uid58545	NC_008599	2	1	1	0	0
757425	Campylobacter jejuni subsp. jejuni ICDCCJ07001	Bacteria	Proteobacteria	Campylobacter_jejuni_ICDCCJ07001_uid61249	NC_014801,NC_014802	2	2	0	0	1
291272	Candidatus Blochmannia pennsylvanicus str. BPEN	Bacteria	Proteobacteria	Candidatus_Blochmannia_pennsylvanicus_BPEN_uid58329	NC_007292	0	0	0	0	0
1202540	Candidatus Carsonella ruddii PC isolate NHV	Bacteria	Proteobacteria	Candidatus_Carsonella_ruddii_PC_isolate_NHV_uid172736	NC_018418	0	0	0	0	0
572265	Candidatus Hamiltonella defensa 5AT (Acyrthosiphon pisum)	Bacteria	Proteobacteria	Candidatus_Hamiltonella_defensa_5AT__Acyrthosiphon_pisum__uid59289	NC_012751,NC_012752	0	0	0	1	0
573234	Candidatus Hodgkinia cicadicola Dsem	Bacteria	Proteobacteria	Candidatus_Hodgkinia_cicadicola_Dsem_uid59311	NC_012960	0	0	0	0	0
537021	Candidatus Liberibacter asiaticus str. psy62	Bacteria	Proteobacteria	Candidatus_Liberibacter_asiaticus_psy62_uid59227	NC_012985	0	0	0	0	0
696127	Candidatus Midichloria mitochondrii IricVA	Bacteria	Proteobacteria	Candidatus_Midichloria_mitochondrii_IricVA_uid68687	NC_015722	1	1	0	0	0
335992	Candidatus Pelagibacter ubique HTCC1062	Bacteria	Proteobacteria	Candidatus_Pelagibacter_ubique_HTCC1062_uid58401	NC_007205	0	0	0	0	0
1239881	Candidatus Portiera aleyrodidarum BT-QVLC	Bacteria	Proteobacteria	Candidatus_Portiera_aleyrodidarum_BT_QVLC_uid175570	NC_018618	0	0	0	0	0
488538	Candidatus Puniceispirillum marinum IMCC1322	Bacteria	Proteobacteria	Candidatus_Puniceispirillum_marinum_IMCC1322_uid47081	NC_014010	0	0	0	0	0
515618	Candidatus Riesia pediculicola USDA	Bacteria	Proteobacteria	Candidatus_Riesia_pediculicola_USDA_uid46841	NC_013962,NC_014109	0	0	0	0	0
1053648	Candidatus Tremblaya princeps PCVAL	Bacteria	Proteobacteria	Candidatus_Tremblaya_princeps_PCVAL_uid159519	NC_017293	0	0	0	0	0
412965	Candidatus Vesicomyosocius okutanii HA	Bacteria	Proteobacteria	Candidatus_Vesicomyosocius_okutanii_HA_uid59427	NC_009465	1	1	0	0	0
871271	Candidatus Zinderia insecticola CARI	Bacteria	Proteobacteria	Candidatus_Zinderia_insecticola_CARI_uid52459	NC_014497	0	0	0	0	0
290398	Chromohalobacter salexigens DSM 3043	Bacteria	Proteobacteria	Chromohalobacter_salexigens_DSM_3043_uid62921	NC_007963	1	1	0	1	0
1144275	Corallococcus coralloides DSM 2259	Bacteria	Proteobacteria	Corallococcus_coralloides_DSM_2259_uid157997	NC_017030	2	1	1	2	1
434922	Coxiella burnetii Dugway 5J108-111	Bacteria	Proteobacteria	Coxiella_burnetii_Dugway_5J108_111_uid58629	NC_009726,NC_009727	1	1	0	0	0
385025	Cycloclasticus sp. P1	Bacteria	Proteobacteria	Cycloclasticus_P1_uid176368	NC_018697	3	3	0	2	0
644282	Desulfarculus baarsii DSM 2075	Bacteria	Proteobacteria	Desulfarculus_baarsii_DSM_2075_uid51371	NC_014365	4	1	3	0	0
439235	Desulfatibacillum alkenivorans AK-01	Bacteria	Proteobacteria	Desulfatibacillum_alkenivorans_AK_01_uid58913	NC_011768	1	1	0	1	0
880072	Desulfobacca acetoxidans DSM 11109	Bacteria	Proteobacteria	Desulfobacca_acetoxidans_DSM_11109_uid65785	NC_015388	5	2	3	5	0
651182	Desulfobacula toluolica Tol2	Bacteria	Proteobacteria	Desulfobacula_toluolica_Tol2_uid175777	NC_018645	2	2	0	0	0
577650	Desulfobulbus propionicus DSM 2032	Bacteria	Proteobacteria	Desulfobulbus_propionicus_DSM_2032_uid62265	NC_014972	3	2	1	2	0
96561	Desulfococcus oleovorans Hxd3	Bacteria	Proteobacteria	Desulfococcus_oleovorans_Hxd3_uid58777	NC_009943	3	2	1	1	0
706587	Desulfomonile tiedjei DSM 6799	Bacteria	Proteobacteria	Desulfomonile_tiedjei_DSM_6799_uid168320	NC_018025,NC_018026	5	2	3	4	1
573370	Desulfovibrio magneticus RS-1	Bacteria	Proteobacteria	Desulfovibrio_magneticus_RS_1_uid59309	NC_012795,NC_012796,NC_012797	4	1	3	2	1
883	Desulfovibrio vulgaris str. 'Miyazaki F'	Bacteria	Proteobacteria	Desulfovibrio_vulgaris__Miyazaki_F__uid59089	NC_011769	4	1	3	2	1
589865	Desulfurivibrio alkaliphilus AHT2	Bacteria	Proteobacteria	Desulfurivibrio_alkaliphilus_AHT2_uid49487	NC_014216	2	2	0	2	0
246195	Dichelobacter nodosus VCS1703A	Bacteria	Proteobacteria	Dichelobacter_nodosus_VCS1703A_uid57643	NC_009446	0	0	0	0	0
718251	Edwardsiella tarda FL6-60	Bacteria	Proteobacteria	Edwardsiella_tarda_FL6_60_uid159657	NC_017309,NC_017318	2	1	1	1	1
254945	Ehrlichia ruminantium str. Welgevonden	Bacteria	Proteobacteria	Ehrlichia_ruminantium_Welgevonden_uid58013	NC_005295	0	0	0	0	0
481805	Escherichia coli ATCC 8739	Bacteria	Proteobacteria	Escherichia_coli_ATCC_8739_uid58783	NC_010468	3	2	1	1	1
401614	Francisella novicida U112	Bacteria	Proteobacteria	Francisella_novicida_U112_uid58499	NC_008601	1	0	1	0	1
767434	Frateuria aurantia DSM 6220	Bacteria	Proteobacteria	Frateuria_aurantia_DSM_6220_uid81775	NC_017033	1	1	0	0	0
83406	gamma proteobacterium HdN1	Bacteria	Proteobacteria	gamma_proteobacterium_HdN1_uid51635	NC_014366	3	2	1	0	1
269799	Geobacter metallireducens GS-15	Bacteria	Proteobacteria	Geobacter_metallireducens_GS_15_uid57731	NC_007515,NC_007517	1	1	0	2	1
290633	Gluconobacter oxydans 621H	Bacteria	Proteobacteria	Gluconobacter_oxydans_621H_uid58239	NC_006672,NC_006673,NC_006674,NC_006675,NC_006676,NC_006677	1	1	0	0	0
391165	Granulibacter bethesdensis CGDNIH1	Bacteria	Proteobacteria	Granulibacter_bethesdensis_CGDNIH1_uid58661	NC_008343	1	1	0	0	1
262727	Haemophilus influenzae R2846	Bacteria	Proteobacteria	Haemophilus_influenzae_R2846_uid161921	NC_017452	1	1	0	0	0
349521	Hahella chejuensis KCTC 2396	Bacteria	Proteobacteria	Hahella_chejuensis_KCTC_2396_uid58483	NC_007645	2	2	0	3	0
502025	Haliangium ochraceum DSM 14365	Bacteria	Proteobacteria	Haliangium_ochraceum_DSM_14365_uid41425	NC_013440	1	1	0	2	0
349124	Halorhodospira halophila SL1	Bacteria	Proteobacteria	Halorhodospira_halophila_SL1_uid58473	NC_008789	1	1	0	2	0
555778	Halothiobacillus neapolitanus c2	Bacteria	Proteobacteria	Halothiobacillus_neapolitanus_c2_uid41317	NC_013422	2	2	0	2	0
684950	Helicobacter pylori 52	Bacteria	Proteobacteria	Helicobacter_pylori_uid159983	NC_017354	3	2	1	0	0
760142	Hippea maritima DSM 10411	Bacteria	Proteobacteria	Hippea_maritima_DSM_10411_uid65267	NC_015318	1	1	0	1	0
582402	Hirschia baltica ATCC 49814	Bacteria	Proteobacteria	Hirschia_baltica_ATCC_49814_uid59365	NC_012982,NC_012983	3	2	1	0	0
283942	Idiomarina loihiensis L2TR	Bacteria	Proteobacteria	Idiomarina_loihiensis_L2TR_uid58087	NC_006512	3	3	0	0	0
523791	Kangiella koreensis DSM 16069	Bacteria	Proteobacteria	Kangiella_koreensis_DSM_16069_uid59209	NC_013166	3	3	0	1	0
363253	Lawsonia intracellularis PHE/MN1-00	Bacteria	Proteobacteria	Lawsonia_intracellularis_PHE_MN1_00_uid61575	NC_008011,NC_008012,NC_008013,NC_008014	2	1	1	0	0
661367	Legionella longbeachae NSW150	Bacteria	Proteobacteria	Legionella_longbeachae_NSW150_uid46099	NC_013861,NC_014544	4	3	1	4	1
933093	Legionella pneumophila subsp. pneumophila ATCC 43290	Bacteria	Proteobacteria	Legionella_pneumophila_ATCC_43290_uid86885	NC_016811	5	3	2	2	0
395495	Leptothrix cholodnii SP-6	Bacteria	Proteobacteria	Leptothrix_cholodnii_SP_6_uid58971	NC_010524	3	3	0	2	0
156889	Magnetococcus marinus MC-1	Bacteria	Proteobacteria	Magnetococcus_MC_1_uid57833	NC_008576	2	2	0	0	0
394221	Maricaulis maris MCS10	Bacteria	Proteobacteria	Maricaulis_maris_MCS10_uid58689	NC_008347	2	2	0	0	0
351348	Marinobacter aquaeolei VT8	Bacteria	Proteobacteria	Marinobacter_aquaeolei_VT8_uid59419	NC_008738,NC_008739,NC_008740	3	3	0	2	0
491952	Marinomonas posidonica IVIA-Po-181	Bacteria	Proteobacteria	Marinomonas_posidonica_IVIA_Po_181_uid67323	NC_015559	1	1	0	0	0
754477	Methylophaga sp. JAM7	Bacteria	Proteobacteria	Methylophaga_JAM7_uid162949	NC_017856,NC_017858	1	1	0	0	0
856793	Micavibrio aeruginosavorus ARL-13	Bacteria	Proteobacteria	Micavibrio_aeruginosavorus_ARL_13_uid73585	NC_016026	3	1	2	0	0
598659	Nautilia profundicola AmH	Bacteria	Proteobacteria	Nautilia_profundicola_AmH_uid59345	NC_012115	0	0	0	1	0
272831	Neisseria meningitidis FAM18	Bacteria	Proteobacteria	Neisseria_meningitidis_FAM18_uid57825	NC_008767	2	2	0	0	0
434131	Neorickettsia risticii str. Illinois	Bacteria	Proteobacteria	Neorickettsia_risticii_Illinois_uid58889	NC_013009	0	0	0	0	0
387092	Nitratiruptor sp. SB155-2	Bacteria	Proteobacteria	Nitratiruptor_SB155_2_uid58861	NC_009662	1	1	0	1	0
323261	Nitrosococcus oceani ATCC 19707	Bacteria	Proteobacteria	Nitrosococcus_oceani_ATCC_19707_uid58403	NC_007483,NC_007484	2	2	0	2	0
357244	Orientia tsutsugamushi str. Boryong	Bacteria	Proteobacteria	Orientia_tsutsugamushi_Boryong_uid61621	NC_009488	0	0	0	0	0
932677	Pantoea ananatis AJ13355	Bacteria	Proteobacteria	Pantoea_ananatis_AJ13355_uid162073	NC_017531,NC_017533	2	1	1	1	1
402881	Parvibaculum lavamentivorans DS-1	Bacteria	Proteobacteria	Parvibaculum_lavamentivorans_DS_1_uid58739	NC_009719	6	3	3	1	1
314260	Parvularcula bermudensis HTCC2503	Bacteria	Proteobacteria	Parvularcula_bermudensis_HTCC2503_uid51641	NC_014414	2	2	0	0	0
1082931	Pelagibacterium halotolerans B2	Bacteria	Proteobacteria	Pelagibacterium_halotolerans_B2_uid74393	NC_016078,NC_016079	5	3	2	0	0
338963	Pelobacter carbinolicus DSM 2380	Bacteria	Proteobacteria	Pelobacter_carbinolicus_DSM_2380_uid58241	NC_007498	2	2	0	3	0
383629	Phaeobacter gallaeciensis 2.10	Bacteria	Proteobacteria	Phaeobacter_gallaeciensis_2_10_uid54715	NC_018286,NC_018421,NC_018422,NC_018423	3	2	1	0	0
450851	Phenylobacterium zucineum HLK1	Bacteria	Proteobacteria	Phenylobacterium_zucineum_HLK1_uid58959	NC_011143,NC_011144	7	6	1	2	0
991905	Polymorphum gilvum SL003B-26A1	Bacteria	Proteobacteria	Polymorphum_gilvum_SL003B_26A1_uid65447	NC_015258,NC_015259	5	3	2	3	0
312153	Polynucleobacter necessarius subsp. asymbioticus QLW-P1DMWA-1	Bacteria	Proteobacteria	Polynucleobacter_necessarius_asymbioticus_QLW_P1DMWA_1_uid58611	NC_009379	3	2	1	0	1
529507	Proteus mirabilis HI4320	Bacteria	Proteobacteria	Proteus_mirabilis_HI4320_uid61599	NC_010554,NC_010555	2	1	1	0	0
208964	Pseudomonas aeruginosa PAO1	Bacteria	Proteobacteria	Pseudomonas_aeruginosa_PAO1_uid57945	NC_002516	4	2	2	2	1
335284	Psychrobacter cryohalolentis K5	Bacteria	Proteobacteria	Psychrobacter_cryohalolentis_K5_uid58373	NC_007968,NC_007969	4	3	1	0	0
357804	Psychromonas ingrahamii 37	Bacteria	Proteobacteria	Psychromonas_ingrahamii_37_uid58521	NC_008709	4	4	0	2	0
648757	Rhodomicrobium vannielii ATCC 17100	Bacteria	Proteobacteria	Rhodomicrobium_vannielii_ATCC_17100_uid43247	NC_014664	4	2	2	0	1
258594	Rhodopseudomonas palustris CGA009	Bacteria	Proteobacteria	Rhodopseudomonas_palustris_CGA009_uid62901	NC_005296,NC_005297	4	2	2	2	1
272947	Rickettsia prowazekii str. Madrid E	Bacteria	Proteobacteria	Rickettsia_prowazekii_Madrid_E_uid61565	NC_000963	0	0	0	0	0
203122	Saccharophagus degradans 2-40	Bacteria	Proteobacteria	Saccharophagus_degradans_2_40_uid57921	NC_007912	3	3	0	0	0
568817	Serratia symbiotica str. 'Cinara cedri'	Bacteria	Proteobacteria	Serratia_symbiotica__Cinara_cedri__uid82363	NC_016632	0	0	0	0	0
326297	Shewanella amazonensis SB2B	Bacteria	Proteobacteria	Shewanella_amazonensis_SB2B_uid58257	NC_008700	2	2	0	0	0
448385	Sorangium cellulosum So ce56	Bacteria	Proteobacteria	Sorangium_cellulosum__So_ce_56__uid61629	NC_010162	4	2	2	4	1
326298	Sulfurimonas denitrificans DSM 1251	Bacteria	Proteobacteria	Sulfurimonas_denitrificans_DSM_1251_uid58185	NC_007575	2	2	0	0	0
335543	Syntrophobacter fumaroxidans MPOB	Bacteria	Proteobacteria	Syntrophobacter_fumaroxidans_MPOB_uid58177	NC_008554	2	1	1	1	1
56780	Syntrophus aciditrophicus SB	Bacteria	Proteobacteria	Syntrophus_aciditrophicus_SB_uid58539	NC_007759	2	2	0	5	0
396595	Thioalkalivibrio sp. K90mix	Bacteria	Proteobacteria	Thioalkalivibrio_K90mix_uid46181	NC_013889,NC_013930	2	2	0	2	0
317025	Thiomicrospira crunogena XCL-2	Bacteria	Proteobacteria	Thiomicrospira_crunogena_XCL_2_uid58183	NC_007520	4	3	1	2	0
1110502	Tistrella mobilis KA081020-065	Bacteria	Proteobacteria	Tistrella_mobilis_KA081020_065_uid167486	NC_017956,NC_017957,NC_017958,NC_017959,NC_017966	7	5	2	1	1
1116375	Vibrio sp. EJY3	Bacteria	Proteobacteria	Vibrio_EJY3_uid83161	NC_016613,NC_016614	3	2	1	1	0
36870	Wigglesworthia glossinidia endosymbiont of Glossina brevipalpis	Bacteria	Proteobacteria	Wigglesworthia_glossinidia_endosymbiont_of_Glossina_brevipalpis_uid57853	NC_003425,NC_004344	0	0	0	0	0
273121	Wolinella succinogenes DSM 1740	Bacteria	Proteobacteria	Wolinella_succinogenes_DSM_1740_uid61591	NC_005090	4	2	2	0	0
264203	Zymomonas mobilis subsp. mobilis ZM4 = ATCC 31821	Bacteria	Proteobacteria	Zymomonas_mobilis_ZM4_uid58095	NC_006526	1	1	0	0	0
314723	Borrelia hermsii HS1	Bacteria	Spirochaetes	Borrelia_hermsii_DAH_uid59225	NC_010673	0	0	0	0	0
759914	Brachyspira pilosicoli 95/1000	Bacteria	Spirochaetes	Brachyspira_pilosicoli_95_1000_uid50609	NC_014330	2	1	1	1	0
355277	Leptospira borgpetersenii serovar Hardjo-bovis str. JB197	Bacteria	Spirochaetes	Leptospira_borgpetersenii_serovar_Hardjo_bovis_JB197_uid58509	NC_008510,NC_008511	2	2	0	0	0
760011	Sphaerochaeta coccoides DSM 17374	Bacteria	Spirochaetes	Spirochaeta_coccoides_DSM_17374_uid66331	NC_015436	2	1	1	2	0
889378	Spirochaeta africana DSM 8902	Bacteria	Spirochaetes	Spirochaeta_africana_DSM_8902_uid81779	NC_017098	3	1	2	1	0
573413	Spirochaeta smaragdinae DSM 11293	Bacteria	Spirochaetes	Spirochaeta_smaragdinae_DSM_11293_uid51369	NC_014364	3	2	1	0	0
869211	Spirochaeta thermophila DSM 6578	Bacteria	Spirochaetes	Spirochaeta_thermophila_DSM_6578_uid162041	NC_017583	2	1	1	0	0
906968	Treponema brennaborense DSM 12168	Bacteria	Spirochaetes	Treponema_brennaborense_DSM_12168_uid66607	NC_015500	2	1	1	0	0
744872	Treponema caldaria DSM 7334	Bacteria	Spirochaetes	Spirochaeta_caldaria_DSM_7334_uid68753	NC_015732	2	1	1	1	0
243275	Treponema denticola ATCC 35405	Bacteria	Spirochaetes	Treponema_denticola_ATCC_35405_uid57583	NC_002967	3	1	2	0	0
686990	Treponema pallidum subsp. pallidum str. Mexico A	Bacteria	Spirochaetes	Treponema_pallidum_Mexico_A_uid176920	NC_018722	1	1	0	0	0
869212	Turneriella parva DSM 21527	Bacteria	Spirochaetes	Turneriella_parva_DSM_21527_uid168321	NC_018020,NC_018021	2	2	0	2	1
525903	Thermanaerovibrio acidaminovorans DSM 6589	Bacteria	Synergistetes	Thermanaerovibrio_acidaminovorans_DSM_6589_uid41925	NC_013522	2	1	1	0	0
580340	Thermovirga lienii DSM 17291	Bacteria	Synergistetes	Thermovirga_lienii_DSM_17291_uid77129	NC_016148,NC_016149	2	1	1	1	0
441768	Acholeplasma laidlawii PG-8A	Bacteria	Tenericutes	Acholeplasma_laidlawii_PG_8A_uid58901	NC_010163	5	2	3	3	0
37692	Candidatus Phytoplasma mali	Bacteria	Tenericutes	Candidatus_Phytoplasma_mali_uid59087	NC_011047	1	0	1	3	0
2110	Mycoplasma agalactiae	Bacteria	Tenericutes	Mycoplasma_agalactiae_uid46679	NC_013948	0	0	0	2	0
243272	Mycoplasma arthritidis 158L3-1	Bacteria	Tenericutes	Mycoplasma_arthritidis_158L3_1_uid58005	NC_011025	0	0	0	2	0
572263	Mycoplasma conjunctivae HRC/581	Bacteria	Tenericutes	Mycoplasma_conjunctivae_HRC_581_uid59325	NC_012806	1	1	0	1	0
637387	Mycoplasma fermentans JER	Bacteria	Tenericutes	Mycoplasma_fermentans_JER_uid53543	NC_014552	0	0	0	1	0
710128	Mycoplasma gallisepticum str. R(high)	Bacteria	Tenericutes	Mycoplasma_gallisepticum_R_high__uid161999	NC_017502	0	0	0	1	0
243273	Mycoplasma genitalium G37	Bacteria	Tenericutes	Mycoplasma_genitalium_G37_uid57707	NC_000908	0	0	0	1	0
1111676	Mycoplasma haemocanis str. Illinois	Bacteria	Tenericutes	Mycoplasma_haemocanis_Illinois_uid82367	NC_016638	0	0	0	0	0
262722	Mycoplasma hyopneumoniae 7448	Bacteria	Tenericutes	Mycoplasma_hyopneumoniae_7448_uid58039	NC_007332	0	0	0	1	0
872331	Mycoplasma hyorhinis HUB-1	Bacteria	Tenericutes	Mycoplasma_hyorhinis_HUB_1_uid51695	NC_014448	0	0	0	1	0
267748	Mycoplasma mobile 163K	Bacteria	Tenericutes	Mycoplasma_mobile_163K_uid58077	NC_006908	0	0	0	0	0
862259	Mycoplasma mycoides subsp. capri LC str. 95010	Bacteria	Tenericutes	Mycoplasma_mycoides_capri_LC_95010_uid66189	NC_015431	0	0	0	3	0
272633	Mycoplasma penetrans HF-2	Bacteria	Tenericutes	Mycoplasma_penetrans_HF_2_uid57729	NC_004432	1	1	0	2	0
272635	Mycoplasma pulmonis UAB CTIP	Bacteria	Tenericutes	Mycoplasma_pulmonis_UAB_CTIP_uid61569	NC_002771	0	0	0	1	0
262723	Mycoplasma synoviae 53	Bacteria	Tenericutes	Mycoplasma_synoviae_53_uid58061	NC_007294	0	0	0	1	0
1197325	Mycoplasma wenyonii str. Massachusetts	Bacteria	Tenericutes	Mycoplasma_wenyonii_Massachusetts_uid170731	NC_018149	0	0	0	0	0
565575	Ureaplasma urealyticum serovar 10 str. ATCC 33699	Bacteria	Tenericutes	Ureaplasma_urealyticum_serovar_10_ATCC_33699_uid59011	NC_011374	1	1	0	1	0
795359	Thermodesulfobacterium geofontis OPF15	Bacteria	Thermodesulfobacteria	Thermodesulfobacterium_OPB45_uid68283	NC_015682	1	1	0	2	0
381764	Fervidobacterium nodosum Rt17-B1	Bacteria	Thermotogae	Fervidobacterium_nodosum_Rt17_B1_uid58625	NC_009718	1	1	0	0	0
521045	Kosmotoga olearia TBF 19.5.1	Bacteria	Thermotogae	Kosmotoga_olearia_TBF_19_5_1_uid59205	NC_012785	1	1	0	0	0
443254	Marinitoga piezophila KA3	Bacteria	Thermotogae	Marinitoga_piezophila_KA3_uid81629	NC_016748,NC_016751	1	0	1	0	0
403833	Petrotoga mobilis SJ95	Bacteria	Thermotogae	Petrotoga_mobilis_SJ95_uid58747	NC_010003	3	2	1	1	0
416591	Thermotoga lettingae TMO	Bacteria	Thermotogae	Thermotoga_lettingae_TMO_uid58419	NC_009828	2	1	1	1	0
459349	Candidatus Cloacamonas acidaminovorans str. Evry	Bacteria	unclassified Bacteria	Candidatus_Cloacamonas_acidaminovorans_uid62959	NS_000195	2	1	1	1	0
671143	Candidatus Methylomirabilis oxyfera	Bacteria	unclassified Bacteria	Candidatus_Methylomirabilis_oxyfera_uid161981	NC_013260	1	1	0	3	0
525904	Thermobaculum terrenum ATCC BAA-798	Bacteria	unclassified Bacteria	Thermobaculum_terrenum_ATCC_BAA_798_uid42011	NC_013525,NC_013526	5	3	2	2	1
					Total	873	550	323	514	108
