# Supplementary material for: Origin and evolution of metal P-type ATPases in Plantae (Archaeplastida)
Source: Front Plant Sci. 2014 Jan 7;4:544. doi: 10.3389/fpls.2013.00544 (PMC3922081; doi:10.3389/fpls.2013.00544)
Supplement: Table S2 — Overview of eukaryotic genomes included in the study. The number of monovalent metal (AI.Me+) and divalent metal (AI.Me2+) ATPases identified in each genome is provided. [file TableS2.XLS]

## Sheet: table-s2
ncbi.taxid	organism	kingdom	phylum	source	filename	AI.Me+	AI.M2+
5821	Plasmodium berghei	Alveolata	Apicomplexa	Ensembl Genomes 17	Plasmodium_berghei.May_2010.17.pep.all.fa	1	0
5825	Plasmodium chabaudi	Alveolata	Apicomplexa	Ensembl Genomes 17	Plasmodium_chabaudi.May_2010.17.pep.all.fa	1	0
5833	Plasmodium falciparum	Alveolata	Apicomplexa	Ensembl Genomes 17	Plasmodium_falciparum.ASM276v1.17.pep.all.fa	1	0
5850	Plasmodium knowlesi	Alveolata	Apicomplexa	Ensembl Genomes 17	Plasmodium_knowlesi.EPr1.17.pep.all.fa	1	0
5855	Plasmodium vivax	Alveolata	Apicomplexa	Ensembl Genomes 17	Plasmodium_vivax.ASM241v1.17.pep.all.fa	1	0
5811	Toxoplasma gondii	Alveolata	Apicomplexa	Ensembl Genomes 17	Toxoplasma_gondii.JCVI-tgg-v1.0.17.pep.all.fa	1	0
5911	Tetrahymena thermophila	Alveolata	Ciliophora	Ensembl Genomes 17	Tetrahymena_thermophila.JCVI-TTA1-2.2.17.pep.all.fa	2	0
5759	Entamoeba histolytica	Amoebozoa	Archamoebae	Ensembl Genomes 17	Entamoeba_histolytica.JCVI-ESG2-1.0.17.pep.all.fa	0	0
44689	Dictyostelium discoideum	Amoebozoa	Mycetozoa	Ensembl Genomes 17	Dictyostelium_discoideum.dictybase.01.17.pep.all.fa	4	0
5786	Dictyostelium purpureum	Amoebozoa	Mycetozoa	JGI Genome Portal	Dicpu1_best_proteins.fasta	3	0
905079	Guillardia theta CCMP2712	Cryptophyta	Pyrenomonadales	JGI Genome Portal	Guith1_GeneCatalog_proteins_20101209.aa.fasta	2	0
5664	Leishmania major	Euglenozoa	Kinetoplastida	Ensembl Genomes 17	Leishmania_major.ASM272v2.17.pep.all.fa	1	0
5691	Trypanosoma brucei	Euglenozoa	Kinetoplastida	Ensembl Genomes 17	Trypanosoma_brucei.TryBru_Apr2005_chr11.17.pep.all.fa	1	0
184922	Giardia lamblia ATCC 50803	Fornicata	Diplomonadida	Ensembl Genomes 17	Giardia_lamblia.GCA_000002435.1.17.pep.all.fa	1	0
280463	Emiliania huxleyi CCMP1516	Haptophyceae	Isochrysidales	JGI Genome Portal	Emihu1_reduced_proteins.fasta	0	3
5762	Naegleria gruberi	Heterolobosea	Schizopyrenida	JGI Genome Portal	Naegr1_best_proteins.fasta	3	0
81824	Monosiga brevicollis	Opisthokonta	Choanoflagellida	JGI Genome Portal	Monbr1_best_proteins.fasta	1	0
5057	Aspergillus clavatus	Opisthokonta	Fungi	Ensembl Genomes 17	Aspergillus_clavatus.CADRE.17.pep.all.fa	3	0
5059	Aspergillus flavus	Opisthokonta	Fungi	Ensembl Genomes 17	Aspergillus_flavus.JCVI-afl1-v2.0.17.pep.all.fa	4	0
451804	Aspergillus fumigatus A1163	Opisthokonta	Fungi	Ensembl Genomes 17	Aspergillus_fumigatusa1163.CADRE.17.pep.all.fa	2	0
746128	Aspergillus fumigatus	Opisthokonta	Fungi	Ensembl Genomes 17	Aspergillus_fumigatus.CADRE.17.pep.all.fa	3	0
5061	Aspergillus niger	Opisthokonta	Fungi	Ensembl Genomes 17	Aspergillus_niger.CADRE.17.pep.all.fa	2	0
5062	Aspergillus oryzae	Opisthokonta	Fungi	Ensembl Genomes 17	Aspergillus_oryzae.CADRE2.17.pep.all.fa	4	0
33178	Aspergillus terreus	Opisthokonta	Fungi	Ensembl Genomes 17	Aspergillus_terreus.CADRE.17.pep.all.fa	3	0
40559	Botryotinia fuckeliana	Opisthokonta	Fungi	Ensembl Genomes 17	Botryotinia_fuckeliana.BotFuc_Aug2005.17.pep.all.fa	3	0
162425	Emericella nidulans	Opisthokonta	Fungi	Ensembl Genomes 17	Aspergillus_nidulans.ASM1142v1.17.pep.all.fa	2	0
33169	Eremothecium gossypii	Opisthokonta	Fungi	Ensembl Genomes 17	Ashbya_gossypii.ASM9102v1.17.pep.all.fa	2	0
5507	Fusarium oxysporum	Opisthokonta	Fungi	Ensembl Genomes 17	Fusarium_oxysporum.FO2.17.pep.all.fa	6	0
29850	Gaeumannomyces graminis	Opisthokonta	Fungi	Ensembl Genomes 17	Gaeumannomyces_graminis.Gae_graminis_V2.17.pep.all.fa	3	0
117187	Gibberella moniliformis	Opisthokonta	Fungi	Ensembl Genomes 17	Gibberella_moniliformis.ASM14955v1.17.pep.all.fa	5	0
5518	Gibberella zeae	Opisthokonta	Fungi	Ensembl Genomes 17	Gibberella_zeae.ASM24013v2.17.pep.all.fa	5	0
31870	Glomerella graminicola	Opisthokonta	Fungi	Ensembl Genomes 17	Glomerella_graminicola.GCA_000149035.1.17.pep.all.fa	4	0
4922	Komagataella pastoris	Opisthokonta	Fungi	Ensembl Genomes 17	Komagataella_pastoris.GCA_000027005.1.17.pep.all.fa	2	0
5022	Leptosphaeria maculans	Opisthokonta	Fungi	Ensembl Genomes 17	Leptosphaeria_maculans.ASM23037v1.17.pep.all.fa	4	0
318829	Magnaporthe oryzae	Opisthokonta	Fungi	Ensembl Genomes 17	Magnaporthe_oryzae.MG8.17.pep.all.fa	3	0
148304	Magnaporthe poae	Opisthokonta	Fungi	Ensembl Genomes 17	Magnaporthe_poae.Mag_poae_ATCC_64411_V1.17.pep.all.fa	1	0
203908	Melampsora larici-populina	Opisthokonta	Fungi	Ensembl Genomes 17	Melampsora_laricipopulina.GCA_000204055.1.17.pep.all.fa	1	0
140110	Nectria haematococca	Opisthokonta	Fungi	Ensembl Genomes 17	Nectria_haematococca.v2.0.17.pep.all.fa	6	0
36630	Neosartorya fischeri	Opisthokonta	Fungi	Ensembl Genomes 17	Neosartorya_fischeri.CADRE.17.pep.all.fa	2	0
5141	Neurospora crassa	Opisthokonta	Fungi	Ensembl Genomes 17	Neurospora_crassa.ASM18292v1.17.pep.all.fa	3	0
13684	Phaeosphaeria nodorum	Opisthokonta	Fungi	Ensembl Genomes 17	Phaeosphaeria_nodorum.ASM14691v1.17.pep.all.fa	3	0
5297	Puccinia graminis	Opisthokonta	Fungi	Ensembl Genomes 17	Puccinia_graminis.ASM14992v1.17.pep.all.fa	1	0
208348	Puccinia triticina	Opisthokonta	Fungi	Ensembl Genomes 17	Puccinia_triticina.ASM15152v1.17.pep.all.fa	2	0
53485	Pyrenophora teres	Opisthokonta	Fungi	Ensembl Genomes 17	Pyrenophora_teres.GCA_000166005.1.17.pep.all.fa	3	0
45151	Pyrenophora tritici-repentis	Opisthokonta	Fungi	Ensembl Genomes 17	Pyrenophora_triticirepentis.GCA_000149985.1.17.pep.all.fa	4	0
4932	Saccharomyces cerevisiae	Opisthokonta	Fungi	Ensembl Genomes 17	Saccharomyces_cerevisiae.SacCer_Apr2011.17.pep.all.fa	2	0
4896	Schizosaccharomyces pombe	Opisthokonta	Fungi	Ensembl Genomes 17	Schizosaccharomyces_pombe.ASM294v1.17.pep.all.fa	1	0
5180	Sclerotinia sclerotiorum	Opisthokonta	Fungi	Ensembl Genomes 17	Sclerotinia_sclerotiorum.ASM14694v1.17.pep.all.fa	2	0
72558	Sporisorium reilianum	Opisthokonta	Fungi	Ensembl Genomes 17	Sporisorium_reilianum.GCA_000230245.1.17.pep.all.fa	2	0
29875	Trichoderma virens	Opisthokonta	Fungi	Ensembl Genomes 17	Trichoderma_virens.ASM17099v1.17.pep.all.fa	3	0
39416	Tuber melanosporum	Opisthokonta	Fungi	Ensembl Genomes 17	Tuber_melanosporum.ASM15164v1.17.pep.all.fa	4	0
5270	Ustilago maydis	Opisthokonta	Fungi	Ensembl Genomes 17	Ustilago_maydis.UM1.17.pep.all.fa	2	0
1047171	Zymoseptoria tritici	Opisthokonta	Fungi	Ensembl Genomes 17	Zymoseptoria_tritici.MG2.17.pep.all.fa	2	0
7029	Acyrthosiphon pisum	Opisthokonta	Metazoa	Ensembl Genomes 17	Acyrthosiphon_pisum.Acyr_1.0.17.pep.all.fa	1	0
7159	Aedes aegypti	Opisthokonta	Metazoa	Ensembl Genomes 17	Aedes_aegypti.AaegL1.17.pep.all.fa	1	0
9646	Ailuropoda melanoleuca	Opisthokonta	Metazoa	Ensembl 70	Ailuropoda_melanoleuca.ailMel1.70.pep.all.fa	2	0
400682	Amphimedon queenslandica	Opisthokonta	Metazoa	Ensembl Genomes 17	Amphimedon_queenslandica.Aqu1.17.pep.all.fa	1	0
28377	Anolis carolinensis	Opisthokonta	Metazoa	Ensembl 70	Anolis_carolinensis.AnoCar2.0.70.pep.all.fa	2	0
43151	Anopheles darlingi	Opisthokonta	Metazoa	Ensembl Genomes 17	Anopheles_darlingi.AdarC1.17.pep.all.fa	2	0
7165	Anopheles gambiae	Opisthokonta	Metazoa	Ensembl Genomes 17	Anopheles_gambiae.AgamP3.17.pep.all.fa	1	0
7460	Apis mellifera	Opisthokonta	Metazoa	Ensembl Genomes 17	Apis_mellifera.Amel_2.0.17.pep.all.fa	1	0
12957	Atta cephalotes	Opisthokonta	Metazoa	Ensembl Genomes 17	Atta_cephalotes.Attacep1.0.17.pep.all.fa	1	0
7091	Bombyx mori	Opisthokonta	Metazoa	Ensembl Genomes 17	Bombyx_mori.Bmor1.17.pep.all.fa	1	0
9913	Bos taurus	Opisthokonta	Metazoa	Ensembl 70	Bos_taurus.UMD3.1.70.pep.all.fa	2	0
7739	Branchiostoma floridae	Opisthokonta	Metazoa	JGI Genome Portal	proteins.Brafl1.fasta	2	0
135651	Caenorhabditis brenneri	Opisthokonta	Metazoa	Ensembl Genomes 17	Caenorhabditis_brenneri.C_brenneri-6.0.1b.17.pep.all.fa	1	0
6238	Caenorhabditis briggsae	Opisthokonta	Metazoa	Ensembl Genomes 17	Caenorhabditis_briggsae.CB4.17.pep.all.fa	1	0
6239	Caenorhabditis elegans	Opisthokonta	Metazoa	Ensembl Genomes 17	Caenorhabditis_elegans.WBcel215.17.pep.all.fa	2	0
281687	Caenorhabditis japonica	Opisthokonta	Metazoa	Ensembl Genomes 17	Caenorhabditis_japonica.C_japonica-7.0.1.17.pep.all.fa	1	0
31234	Caenorhabditis remanei	Opisthokonta	Metazoa	Ensembl Genomes 17	Caenorhabditis_remanei.C_remanei-15.0.1.17.pep.all.fa	2	0
9483	Callithrix jacchus	Opisthokonta	Metazoa	Ensembl 70	Callithrix_jacchus.C_jacchus3.2.1.70.pep.all.fa	2	0
9615	Canis lupus familiaris	Opisthokonta	Metazoa	Ensembl 70	Canis_familiaris.CanFam3.1.70.pep.all.fa	2	0
283909	Capitella teleta	Opisthokonta	Metazoa	JGI Genome Portal	FilteredModelsv1.0.aa.fasta	1	0
10141	Cavia porcellus	Opisthokonta	Metazoa	Ensembl 70	Cavia_porcellus.cavPor3.70.pep.all.fa	2	0
9358	Choloepus hoffmanni	Opisthokonta	Metazoa	Ensembl 70	Choloepus_hoffmanni.choHof1.70.pep.all.fa	0	0
7719	Ciona intestinalis	Opisthokonta	Metazoa	Ensembl 70	Ciona_intestinalis.KH.70.pep.all.fa	1	0
51511	Ciona savignyi	Opisthokonta	Metazoa	Ensembl 70	Ciona_savignyi.CSAV2.0.70.pep.all.fa	1	0
7176	Culex quinquefasciatus	Opisthokonta	Metazoa	Ensembl Genomes 17	Culex_quinquefasciatus.CpipJ1.17.pep.all.fa	2	0
13037	Danaus plexippus	Opisthokonta	Metazoa	Ensembl Genomes 17	Danaus_plexippus.DanPle_1.0.17.pep.all.fa	1	0
7955	Danio rerio	Opisthokonta	Metazoa	Ensembl 70	Danio_rerio.Zv9.70.pep.all.fa	2	0
6669	Daphnia pulex	Opisthokonta	Metazoa	Ensembl Genomes 17	Daphnia_pulex.Dappu1.17.pep.all.fa	1	0
9361	Dasypus novemcinctus	Opisthokonta	Metazoa	Ensembl 70	Dasypus_novemcinctus.dasNov2.70.pep.all.fa	1	0
10020	Dipodomys ordii	Opisthokonta	Metazoa	Ensembl 70	Dipodomys_ordii.dipOrd1.70.pep.all.fa	1	0
7217	Drosophila ananassae	Opisthokonta	Metazoa	Ensembl Genomes 17	Drosophila_ananassae.dana_caf1.17.pep.all.fa	1	0
7220	Drosophila erecta	Opisthokonta	Metazoa	Ensembl Genomes 17	Drosophila_erecta.dere_caf1.17.pep.all.fa	1	0
7222	Drosophila grimshawi	Opisthokonta	Metazoa	Ensembl Genomes 17	Drosophila_grimshawi.dgri_caf1.17.pep.all.fa	1	0
7227	Drosophila melanogaster	Opisthokonta	Metazoa	Ensembl Genomes 17	Drosophila_melanogaster.BDGP5.17.pep.all.fa	1	0
7230	Drosophila mojavensis	Opisthokonta	Metazoa	Ensembl Genomes 17	Drosophila_mojavensis.dmoj_caf1.17.pep.all.fa	1	0
7234	Drosophila persimilis	Opisthokonta	Metazoa	Ensembl Genomes 17	Drosophila_persimilis.dper_caf1.17.pep.all.fa	1	0
7237	Drosophila pseudoobscura	Opisthokonta	Metazoa	Ensembl Genomes 17	Drosophila_pseudoobscura.HGSC2.17.pep.all.fa	1	0
7238	Drosophila sechellia	Opisthokonta	Metazoa	Ensembl Genomes 17	Drosophila_sechellia.dsec_caf1.17.pep.all.fa	1	0
7240	Drosophila simulans	Opisthokonta	Metazoa	Ensembl Genomes 17	Drosophila_simulans.WUGSC1.17.pep.all.fa	1	0
7244	Drosophila virilis	Opisthokonta	Metazoa	Ensembl Genomes 17	Drosophila_virilis.dvir_caf1.17.pep.all.fa	1	0
7260	Drosophila willistoni	Opisthokonta	Metazoa	Ensembl Genomes 17	Drosophila_willistoni.dwil_caf1.17.pep.all.fa	1	0
7245	Drosophila yakuba	Opisthokonta	Metazoa	Ensembl Genomes 17	Drosophila_yakuba.dyak_r1.3_FB2008_07.17.pep.all.fa	1	0
9371	Echinops telfairi	Opisthokonta	Metazoa	Ensembl 70	Echinops_telfairi.TENREC.70.pep.all.fa	2	0
9796	Equus caballus	Opisthokonta	Metazoa	Ensembl 70	Equus_caballus.EquCab2.70.pep.all.fa	2	0
9365	Erinaceus europaeus	Opisthokonta	Metazoa	Ensembl 70	Erinaceus_europaeus.HEDGEHOG.70.pep.all.fa	1	0
9685	Felis catus	Opisthokonta	Metazoa	Ensembl 70	Felis_catus.Felis_catus_6.2.70.pep.all.fa	2	0
8049	Gadus morhua	Opisthokonta	Metazoa	Ensembl 70	Gadus_morhua.gadMor1.70.pep.all.fa	2	0
9031	Gallus gallus	Opisthokonta	Metazoa	Ensembl 70	Gallus_gallus.WASHUC2.70.pep.all.fa	2	0
69293	Gasterosteus aculeatus	Opisthokonta	Metazoa	Ensembl 70	Gasterosteus_aculeatus.BROADS1.70.pep.all.fa	2	0
9593	Gorilla gorilla	Opisthokonta	Metazoa	Ensembl 70	Gorilla_gorilla.gorGor3.1.70.pep.all.fa	2	0
34740	Heliconius melpomene	Opisthokonta	Metazoa	Ensembl Genomes 17	Heliconius_melpomene.Hmel1.17.pep.all.fa	2	0
6412	Helobdella robusta	Opisthokonta	Metazoa	JGI Genome Portal	proteins.Helro1_FilteredModels3.fasta	2	0
9606	Homo sapiens	Opisthokonta	Metazoa	Ensembl 70	Homo_sapiens.GRCh37.70.pep.all.fa	3	0
6945	Ixodes scapularis	Opisthokonta	Metazoa	Ensembl Genomes 17	Ixodes_scapularis.IscaW1.17.pep.all.fa	2	0
7897	Latimeria chalumnae	Opisthokonta	Metazoa	Ensembl 70	Latimeria_chalumnae.LatCha1.70.pep.all.fa	2	0
225164	Lottia gigantea	Opisthokonta	Metazoa	JGI Genome Portal	Lotgi1_GeneModels_FilteredModels1_aa.fasta	1	0
9785	Loxodonta africana	Opisthokonta	Metazoa	Ensembl 70	Loxodonta_africana.loxAfr3.70.pep.all.fa	2	0
9544	Macaca mulatta	Opisthokonta	Metazoa	Ensembl 70	Macaca_mulatta.MMUL_1.70.pep.all.fa	2	0
9315	Macropus eugenii	Opisthokonta	Metazoa	Ensembl 70	Macropus_eugenii.Meug_1.0.70.pep.all.fa	1	0
9103	Meleagris gallopavo	Opisthokonta	Metazoa	Ensembl 70	Meleagris_gallopavo.UMD2.70.pep.all.fa	2	0
30608	Microcebus murinus	Opisthokonta	Metazoa	Ensembl 70	Microcebus_murinus.micMur1.70.pep.all.fa	1	0
13616	Monodelphis domestica	Opisthokonta	Metazoa	Ensembl 70	Monodelphis_domestica.BROADO5.70.pep.all.fa	2	0
10090	Mus musculus	Opisthokonta	Metazoa	Ensembl 70	Mus_musculus.GRCm38.70.pep.all.fa	2	0
9669	Mustela putorius furo	Opisthokonta	Metazoa	Ensembl 70	Mustela_putorius_furo.MusPutFur1.0.70.pep.all.fa	2	0
59463	Myotis lucifugus	Opisthokonta	Metazoa	Ensembl 70	Myotis_lucifugus.Myoluc2.0.70.pep.all.fa	2	0
7425	Nasonia vitripennis	Opisthokonta	Metazoa	Ensembl Genomes 17	Nasonia_vitripennis.Nvit1.17.pep.all.fa	0	0
45351	Nematostella vectensis	Opisthokonta	Metazoa	Ensembl Genomes 17	Nematostella_vectensis.ASM20922v1.17.pep.all.fa	1	1
61853	Nomascus leucogenys	Opisthokonta	Metazoa	Ensembl 70	Nomascus_leucogenys.Nleu1.0.70.pep.all.fa	2	0
9978	Ochotona princeps	Opisthokonta	Metazoa	Ensembl 70	Ochotona_princeps.pika.70.pep.all.fa	2	0
8128	Oreochromis niloticus	Opisthokonta	Metazoa	Ensembl 70	Oreochromis_niloticus.Orenil1.0.70.pep.all.fa	2	0
9258	Ornithorhynchus anatinus	Opisthokonta	Metazoa	Ensembl 70	Ornithorhynchus_anatinus.OANA5.70.pep.all.fa	2	0
9986	Oryctolagus cuniculus	Opisthokonta	Metazoa	Ensembl 70	Oryctolagus_cuniculus.oryCun2.70.pep.all.fa	2	0
8090	Oryzias latipes	Opisthokonta	Metazoa	Ensembl 70	Oryzias_latipes.MEDAKA1.70.pep.all.fa	2	0
30611	Otolemur garnettii	Opisthokonta	Metazoa	Ensembl 70	Otolemur_garnettii.OtoGar3.70.pep.all.fa	1	0
9598	Pan troglodytes	Opisthokonta	Metazoa	Ensembl 70	Pan_troglodytes.CHIMP2.1.4.70.pep.all.fa	2	0
121225	Pediculus humanus	Opisthokonta	Metazoa	Ensembl Genomes 17	Pediculus_humanus.PhumU1.17.pep.all.fa	1	0
13735	Pelodiscus sinensis	Opisthokonta	Metazoa	Ensembl 70	Pelodiscus_sinensis.PelSin_1.0.70.pep.all.fa	2	0
7757	Petromyzon marinus	Opisthokonta	Metazoa	Ensembl 70	Petromyzon_marinus.Pmarinus_7.0.70.pep.all.fa	1	0
9601	Pongo abelii	Opisthokonta	Metazoa	Ensembl 70	Pongo_abelii.PPYG2.70.pep.all.fa	2	0
54126	Pristionchus pacificus	Opisthokonta	Metazoa	Ensembl Genomes 17	Pristionchus_pacificus.P_pacificus-5.0.17.pep.all.fa	1	0
9813	Procavia capensis	Opisthokonta	Metazoa	Ensembl 70	Procavia_capensis.proCap1.70.pep.all.fa	1	0
132908	Pteropus vampyrus	Opisthokonta	Metazoa	Ensembl 70	Pteropus_vampyrus.pteVam1.70.pep.all.fa	2	0
10116	Rattus norvegicus	Opisthokonta	Metazoa	Ensembl 70	Rattus_norvegicus.Rnor_5.0.70.pep.all.fa	2	0
9305	Sarcophilus harrisii	Opisthokonta	Metazoa	Ensembl 70	Sarcophilus_harrisii.DEVIL7.0.70.pep.all.fa	2	0
6183	Schistosoma mansoni	Opisthokonta	Metazoa	Ensembl Genomes 17	Schistosoma_mansoni.sma_v3.1.17.pep.all.fa	1	0
42254	Sorex araneus	Opisthokonta	Metazoa	Ensembl 70	Sorex_araneus.COMMON_SHREW1.70.pep.all.fa	1	0
43179	Spermophilus tridecemlineatus	Opisthokonta	Metazoa	Ensembl 70	Ictidomys_tridecemlineatus.spetri2.70.pep.all.fa	2	0
7668	Strongylocentrotus purpuratus	Opisthokonta	Metazoa	Ensembl Genomes 17	Strongylocentrotus_purpuratus.Spur2.5.17.pep.all.fa	2	0
9823	Sus scrofa	Opisthokonta	Metazoa	Ensembl 70	Sus_scrofa.Sscrofa10.2.70.pep.all.fa	1	0
59729	Taeniopygia guttata	Opisthokonta	Metazoa	Ensembl 70	Taeniopygia_guttata.taeGut3.2.4.70.pep.all.fa	2	0
31033	Takifugu rubripes	Opisthokonta	Metazoa	Ensembl 70	Takifugu_rubripes.FUGU4.70.pep.all.fa	2	0
9478	Tarsius syrichta	Opisthokonta	Metazoa	Ensembl 70	Tarsius_syrichta.tarSyr1.70.pep.all.fa	2	0
99883	Tetraodon nigroviridis	Opisthokonta	Metazoa	Ensembl 70	Tetraodon_nigroviridis.TETRAODON8.70.pep.all.fa	2	0
7070	Tribolium castaneum	Opisthokonta	Metazoa	Ensembl Genomes 17	Tribolium_castaneum.Tcas3.17.pep.all.fa	1	0
6334	Trichinella spiralis	Opisthokonta	Metazoa	Ensembl Genomes 17	Trichinella_spiralis.Tspiralis1.17.pep.all.fa	1	0
10228	Trichoplax adhaerens	Opisthokonta	Metazoa	JGI Genome Portal	Triad1_best_proteins.fasta	4	0
37347	Tupaia belangeri	Opisthokonta	Metazoa	Ensembl 70	Tupaia_belangeri.TREESHREW.70.pep.all.fa	2	0
9739	Tursiops truncatus	Opisthokonta	Metazoa	Ensembl 70	Tursiops_truncatus.turTru1.70.pep.all.fa	2	0
30538	Vicugna pacos	Opisthokonta	Metazoa	Ensembl 70	Vicugna_pacos.vicPac1.70.pep.all.fa	2	0
8364	Xenopus (Silurana) tropicalis	Opisthokonta	Metazoa	Ensembl 70	Xenopus_tropicalis.JGI_4.2.70.pep.all.fa	1	0
8083	Xiphophorus maculatus	Opisthokonta	Metazoa	Ensembl 70	Xiphophorus_maculatus.Xipmac4.4.2.70.pep.all.fa	2	0
753081	Bigelowiella natans CCMP2755	Rhizaria	Cercozoa	JGI Genome Portal	Bigna1_filtered_proteins.fasta	1	1
45157	Cyanidioschyzon merolae	Rhodophyta	Bangiophyceae	Ensembl Genomes 17	Cyanidioschyzon_merolae.ASM9120v1.17.pep.all.fa	1	1
186039	Fragilariopsis cylindrus	Stramenopiles	Bacillariophyta	JGI Genome Portal	Fracy1_GeneModels_FilteredModels1_aa.fasta	3	4
2850	Phaeodactylum tricornutum	Stramenopiles	Bacillariophyta	Ensembl Genomes 17	Phaeodactylum_tricornutum.ASM15095v1.17.pep.all.fa	2	4
37319	Pseudo-nitzschia multiseries	Stramenopiles	Bacillariophyta	JGI Genome Portal	Psemu1_GeneCatalog_proteins_20111011.aa.fasta	2	2
35128	Thalassiosira pseudonana	Stramenopiles	Bacillariophyta	Ensembl Genomes 17	Thalassiosira_pseudonana.ASM14940v1.17.pep.all.fa	2	1
702273	Aplanochytrium kerguelense PBS07	Stramenopiles	Labyrinthulomycetes	JGI Genome Portal	Aplke1_GeneCatalog_proteins_20121220.aa.fasta	2	2
717989	Aurantiochytrium limacinum ATCC MYA-1381	Stramenopiles	Labyrinthulomycetes	JGI Genome Portal	Aurli1_GeneCatalog_proteins_20120618.aa.fasta	2	2
876976	Schizochytrium aggregatum ATCC 28209	Stramenopiles	Labyrinthulomycetes	JGI Genome Portal	Schag1_GeneCatalog_proteins_20121220.aa.fasta	2	2
653948	Albugo laibachii	Stramenopiles	Oomycetes	Ensembl Genomes 17	Albugo_laibachii.ENA1.17.pep.all.fa	2	0
272952	Hyaloperonospora arabidopsidis	Stramenopiles	Oomycetes	Ensembl Genomes 17	Hyaloperonospora_arabidopsidis.HyaAraEmoy2_2.0.17.pep.all.fa	3	0
763924	Phytophthora capsici LT1534	Stramenopiles	Oomycetes	JGI Genome Portal	Phyca11_filtered_proteins.fasta	5	0
622258	Phytophthora cinnamomi var. cinnamomi	Stramenopiles	Oomycetes	JGI Genome Portal	Phyci1_GeneCatalog_proteins_20120612.aa.fasta	5	0
4787	Phytophthora infestans	Stramenopiles	Oomycetes	Ensembl Genomes 17	Phytophthora_infestans.ASM14294v1.17.pep.all.fa	6	0
164328	Phytophthora ramorum	Stramenopiles	Oomycetes	Ensembl Genomes 17	Phytophthora_ramorum.ASM14973v1.17.pep.all.fa	4	0
67593	Phytophthora sojae	Stramenopiles	Oomycetes	Ensembl Genomes 17	Phytophthora_sojae.ASM14975v1.17.pep.all.fa	5	0
65071	Pythium ultimum	Stramenopiles	Oomycetes	Ensembl Genomes 17	Pythium_ultimum.pug.17.pep.all.fa	3	0
44056	Aureococcus anophagefferens	Stramenopiles	Pelagophyceae	JGI Genome Portal	proteins.Auran1_FilteredModels3.fasta	4	1
763042	Asterochloris sp. Cgr/DA1pho	Viridiplantae	Chlorophyta	JGI Genome Portal	Astpho1_filtered_proteins.fasta	3	0
3055	Chlamydomonas reinhardtii	Viridiplantae	Chlorophyta	Phytozome 9.0	Creinhardtii_236_protein.fa	5	1
554065	Chlorella variabilis	Viridiplantae	Chlorophyta	JGI Genome Portal	Chlorella_NC64A.best_proteins.fasta	4	2
3077	Chlorella vulgaris	Viridiplantae	Chlorophyta	JGI Genome Portal	Chlvu1_best_proteins_3.fasta	4	2
574566	Coccomyxa subellipsoidea C-169	Viridiplantae	Chlorophyta	Phytozome 9.0	CsubellipsoideaC169_227_protein.fa	4	2
564608	Micromonas pusilla CCMP1545	Viridiplantae	Chlorophyta	Phytozome 9.0	MpusillaCCMP1545_228_protein.fa	4	2
296587	Micromonas sp. RCC299	Viridiplantae	Chlorophyta	Phytozome 9.0	MpusillaRCC299_229_protein.fa	4	2
242159	Ostreococcus 'lucimarinus'	Viridiplantae	Chlorophyta	Phytozome 9.0	Olucimarinus_231_protein.fa	3	3
385169	Ostreococcus sp. RCC809	Viridiplantae	Chlorophyta	JGI Genome Portal	OstreococcusRCC809v2.FilteredModels3.proteins.fasta	3	2
70448	Ostreococcus tauri	Viridiplantae	Chlorophyta	JGI Genome Portal	O.tauri.FM.aa.fasta	3	1
3067	Volvox carteri	Viridiplantae	Chlorophyta	Phytozome 9.0	Vcarteri_199_protein.fa	4	1
218851	Aquilegia coerulea	Viridiplantae	Streptophyta	Phytozome 9.0	Acoerulea_195_protein.fa	9	7
59689	Arabidopsis lyrata	Viridiplantae	Streptophyta	Phytozome 9.0	Alyrata_107_protein.fa	4	6
3702	Arabidopsis thaliana	Viridiplantae	Streptophyta	Phytozome 9.0	Athaliana_167_protein.fa	7	4
15368	Brachypodium distachyon	Viridiplantae	Streptophyta	Phytozome 9.0	Bdistachyon_192_protein.fa	6	3
3711	Brassica rapa	Viridiplantae	Streptophyta	Phytozome 9.0	Brapa_197_protein.fa	6	8
81985	Capsella rubella	Viridiplantae	Streptophyta	Phytozome 9.0	Crubella_183_protein.fa	4	7
3649	Carica papaya	Viridiplantae	Streptophyta	Phytozome 9.0	Cpapaya_113_protein.fa	5	2
85681	Citrus clementina	Viridiplantae	Streptophyta	Phytozome 9.0	Cclementina_182_protein.fa	6	5
2711	Citrus sinensis	Viridiplantae	Streptophyta	Phytozome 9.0	Csinensis_154_protein.fa	13	5
3659	Cucumis sativus	Viridiplantae	Streptophyta	Phytozome 9.0	Csativus_122_protein.fa	6	3
71139	Eucalyptus grandis	Viridiplantae	Streptophyta	Phytozome 9.0	Egrandis_201_protein.fa	9	4
98038	Eutrema halophilum	Viridiplantae	Streptophyta	Phytozome 9.0	Thalophila_173_protein.fa	4	5
57918	Fragaria vesca	Viridiplantae	Streptophyta	Phytozome 9.0	Fvesca_226_protein.fa	5	3
3847	Glycine max	Viridiplantae	Streptophyta	Phytozome 9.0	Gmax_189_protein.fa	18	9
29730	Gossypium raimondii	Viridiplantae	Streptophyta	Phytozome 9.0	Graimondii_221_protein.fa	15	6
4513	Hordeum vulgare	Viridiplantae	Streptophyta	Ensembl Genomes 17	Hordeum_vulgare.030312v2.17.pep.all.fa	12	13
4006	Linum usitatissimum	Viridiplantae	Streptophyta	Phytozome 9.0	Lusitatissimum_200_protein.fa	8	4
3750	Malus x domestica	Viridiplantae	Streptophyta	Phytozome 9.0	Mdomestica_196_protein.fa	9	9
3983	Manihot esculenta	Viridiplantae	Streptophyta	Phytozome 9.0	Mesculenta_147_protein.fa	7	3
3880	Medicago truncatula	Viridiplantae	Streptophyta	Phytozome 9.0	Mtruncatula_198_protein.fa	6	3
4155	Mimulus guttatus	Viridiplantae	Streptophyta	Phytozome 9.0	Mguttatus_140_protein.fa	6	3
4530	Oryza sativa	Viridiplantae	Streptophyta	Phytozome 9.0	Osativa_204_protein.fa	8	4
38727	Panicum virgatum	Viridiplantae	Streptophyta	Phytozome 9.0	Pvirgatum_202_protein.fa	15	6
3885	Phaseolus vulgaris	Viridiplantae	Streptophyta	Phytozome 9.0	Pvulgaris_218_protein.fa	8	4
3218	Physcomitrella patens	Viridiplantae	Streptophyta	Phytozome 9.0	Ppatens_152_protein.fa	7	4
3694	Populus trichocarpa	Viridiplantae	Streptophyta	Phytozome 9.0	Ptrichocarpa_210_protein.fa	17	7
3760	Prunus persica	Viridiplantae	Streptophyta	Phytozome 9.0	Ppersica_139_protein.fa	7	2
3988	Ricinus communis	Viridiplantae	Streptophyta	Phytozome 9.0	Rcommunis_119_protein.fa	7	3
88036	Selaginella moellendorffii	Viridiplantae	Streptophyta	Phytozome 9.0	Smoellendorffii_91_protein.fa	8	5
4555	Setaria italica	Viridiplantae	Streptophyta	Phytozome 9.0	Sitalica_164_protein.fa	7	5
4081	Solanum lycopersicum	Viridiplantae	Streptophyta	Phytozome 9.0	Slycopersicum_225_protein.fa	6	2
4113	Solanum tuberosum	Viridiplantae	Streptophyta	Phytozome 9.0	Stuberosum_206_protein.fa	2	2
4558	Sorghum bicolor	Viridiplantae	Streptophyta	Phytozome 9.0	Sbicolor_79_protein.fa	7	5
3641	Theobroma cacao	Viridiplantae	Streptophyta	Phytozome 9.0	Tcacao_233_protein.fa	9	3
29760	Vitis vinifera	Viridiplantae	Streptophyta	Phytozome 9.0	Vvinifera_145_protein.fa	5	2
4577	Zea mays	Viridiplantae	Streptophyta	Phytozome 9.0	Zmays_181_protein.fa	8	10
					Total	665	218
