# Supplementary material for: Origin and evolution of metal P-type ATPases in Plantae (Archaeplastida)
Source: Front Plant Sci. 2014 Jan 7;4:544. doi: 10.3389/fpls.2013.00544 (PMC3922081; doi:10.3389/fpls.2013.00544)
Supplement: Table S3 — Overview of additional ESTs and genomes included in the study. [file TableS3.XLS]

## Sheet: table-s3
ncbi.taxid	organism	kingdom	phylum	bank.type	seq.count
2762	Cyanophora paradoxa	Glaucocystophyceae	Cyanophoraceae	CDS	32167
2762	Cyanophora paradoxa	Glaucocystophyceae	Cyanophoraceae	EST	27955
38271	Glaucocystis nostochinearum	Glaucocystophyceae	Glaucocystales	EST	8755
130081	Galdieria sulphuraria	Rhodophyta	Bangiophyceae	CDS	7448
35688	Porphyridium purpureum	Rhodophyta	Bangiophyceae	EST	227995
1262161	Pyropia haitanensis	Rhodophyta	Bangiophyceae	EST	6035
2788	Pyropia yezoensis	Rhodophyta	Bangiophyceae	CDS	10327
2788	Pyropia yezoensis	Rhodophyta	Bangiophyceae	EST	22431
2769	Chondrus crispus	Rhodophyta	Florideophyceae	CDS	9709
305493	Eucheuma denticulatum	Rhodophyta	Florideophyceae	EST	9368
28020	Furcellaria lumbricalis	Rhodophyta	Florideophyceae	EST	9437
172969	Gracilaria changii	Rhodophyta	Florideophyceae	EST	8147
700169	Laurencia dendroidea	Rhodophyta	Florideophyceae	EST	41897
35845	Acetabularia acetabulum	Viridiplantae	Chlorophyta	EST	4411
38881	Botryococcus braunii	Viridiplantae	Chlorophyta	EST	94931
3111	Prototheca wickerhamii	Viridiplantae	Chlorophyta	EST	5906
471943	Pyramimonas gelidicola	Viridiplantae	Chlorophyta	EST	2042
3189	Scherffelia	Viridiplantae	Chlorophyta	EST	1103
3117	Ulva prolifera	Viridiplantae	Chlorophyta	EST	6738
13818	Adiantum capillus-veneris	Viridiplantae	Streptophyta	EST	30540
13333	Amborella trichopoda	Viridiplantae	Streptophyta	EST	26378
49495	Ceratopteris richardii	Viridiplantae	Streptophyta	EST	5125
96477	Chaetosphaeridium globosum	Viridiplantae	Streptophyta	EST	59098
3144	Chlorokybus atmophyticus	Viridiplantae	Streptophyta	EST	23716
34146	Closterium peracerosum-strigosum-littorale complex	Viridiplantae	Streptophyta	EST	3236
3123	Coleochaete	Viridiplantae	Streptophyta	EST	9813
3369	Cryptomeria japonica	Viridiplantae	Streptophyta	EST	57658
58031	Cycas rumphii	Viridiplantae	Streptophyta	EST	21997
3311	Ginkgo biloba	Viridiplantae	Streptophyta	EST	21590
3382	Gnetum gnemon	Viridiplantae	Streptophyta	EST	10724
355589	Huperzia serrata	Viridiplantae	Streptophyta	EST	3451
3172	Klebsormidiales	Viridiplantae	Streptophyta	EST	60125
3197	Marchantia polymorpha	Viridiplantae	Streptophyta	EST	33692
96475	Mesostigmatophyceae	Viridiplantae	Streptophyta	EST	15972
3148	Nitella	Viridiplantae	Streptophyta	EST	88280
107243	Noccaea caerulescens	Viridiplantae	Streptophyta	EST	4290
77108	Nuphar advena	Viridiplantae	Streptophyta	EST	20589
90694	Osmunda lancea	Viridiplantae	Streptophyta	EST	2684
102169	Penium margaritaceum	Viridiplantae	Streptophyta	EST	76978
3330	Picea glauca	Viridiplantae	Streptophyta	EST	313110
3352	Pinus taeda	Viridiplantae	Streptophyta	EST	328662
278161	Pseudotsuga menziesii var. menziesii	Viridiplantae	Streptophyta	EST	14354
332123	Spirogyra pratensis	Viridiplantae	Streptophyta	EST	7294
38588	Syntrichia ruralis	Viridiplantae	Streptophyta	EST	9991
3377	Welwitschia mirabilis	Viridiplantae	Streptophyta	EST	10129
501451	Zamia vazquezii	Viridiplantae	Streptophyta	EST	11495
